# Supplementary material for: 5-Chlorocoumaranone-Conjugates as Chemiluminescent Protecting Groups (CLPG) and Precursors to Fluorescent Protecting Groups (FPG)
Source: MDPI journal article supplement (doi:10.3390/photochem3030023), 2023-09-07
Supplement: s1 [file s1]

## Supporting Information

### **5-Chlorocoumaranone- Conjugates as Chemiluminescent Protecting Groups (CLPG) and Precursors to Fluorescent Protecting Groups (FPG)**

Tim Lippold, Axel G. Griesbeck,  
Robert Herzhoff, Mathias S.  
Wickleder, Laura Straub, Niko T.  
Flosbach  
Department of Chemistry  
University of Cologne

### **Author Contributions**

A.G.G. Conceptualization: Lead,  
Funding Acquisition: Lead  
T.L Conceptualization: Assist,  
Investigation: Lead  
R.H. Investigation: Assist  
M.S.W. Conceptualization: Assist  
L.S. Methodology: Lead  
N.T.F. Methodology: Assist

## Table of contents

|                                             |    |
|---------------------------------------------|----|
| 1. NMR and IR spectra.....                  | 1  |
| 1.1 NMR and IR spectra of compound 5A ..... | 1  |
| 1.2 NMR and IR spectra of compound 5E.....  | 5  |
| 1.3 NMR and IR spectra of compound 6 .....  | 9  |
| 1.4 NMR and IR spectra of compound 8 .....  | 13 |
| 2. Decomposition Experiments.....           | 17 |
| 2.1 NMR and ESI-spectra of 5E.....          | 20 |
| 2.2 NMR-spectra of 5A.....                  | 23 |
| 2.3 NMR-spectra of 12.....                  | 28 |

Error! Use the Home tab to apply Überschrift 1 to the text that you want to appear here.

## 1. NMR and IR spectra

### 1.1 NMR and IR spectra of compound 5A

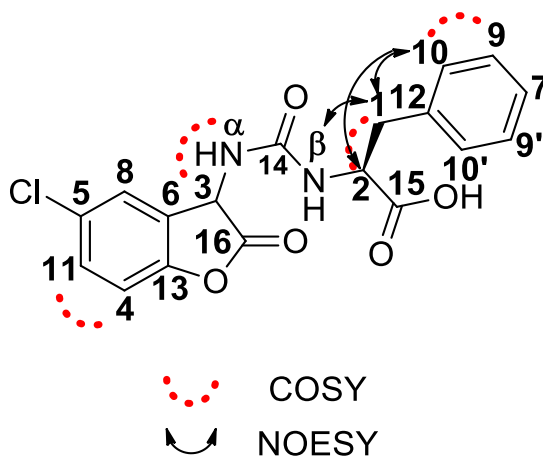

**Table S1:** 1D and 2D-NMR data of (2S)-2-(3-(5-chloro-2-oxo-2,3-dihydrobenzofuran-3-yl)ureido)-3-phenylpropanoic acid (5A) in DMSO- $d_6$ , at 298 K and 500 MHz for  $^1\text{H}$  and 125 MHz for  $^{13}\text{C}$ .

| No.                | $\delta_{\text{H}}$ [ppm], $J$ in [Hz]         | $\delta_{\text{C}}$ [ppm], mult.                  | HMBC ( $^{\circ}\text{J}$ )                                                                                                                       |
|--------------------|------------------------------------------------|---------------------------------------------------|---------------------------------------------------------------------------------------------------------------------------------------------------|
| 1                  | 3.26+3.36 (2H, m)                              | 33.3+33.4, $\text{CH}_2$                          | $\text{C1} \rightarrow \text{H2}(^2\text{J}), \text{H10}(^3\text{J})$                                                                             |
| 2                  | 4.83+4.84 (1H, $\psi\text{t}$ , $J = 10.9$ Hz) | 52.92+52.98, CH                                   | $\text{C2} \rightarrow \text{H1}(^2\text{J})$                                                                                                     |
| 3                  | 5.21+5.30 (1H, s)                              | 54.01+54.04, CH                                   | $\text{C3} \rightarrow \text{H4}(^4\text{J}), \text{H8}(^3\text{J}), \text{NH}_\alpha(^2\text{J})$                                                |
| 4                  | 6.84+6.87 (1H, d, $J = 8.7$ Hz)                | 117.0+117.2, $\text{CH}_{\text{arom}}$            | $\text{C4} \rightarrow \text{NH}_\beta(^7\text{J})$                                                                                               |
| 5                  | -                                              | 122.42+122.47, $\text{C}_q$                       | $\text{C5} \rightarrow \text{H8}(^2\text{J}), \text{H4}(^3\text{J}), \text{H11}(^2\text{J})$                                                      |
| 6                  | -                                              | 123.59+123.60, $\text{C}_q$                       | $\text{C6} \rightarrow \text{H3}(^2\text{J}), \text{H4}(^3\text{J}), \text{NH}_\beta(^5\text{J})$                                                 |
| 7                  | 7.22 (1H, m)                                   | 126.6+126.7, $\text{CH}_{\text{arom}}$            | $\text{C7} \rightarrow \text{H10}(^3\text{J})$                                                                                                    |
| 8                  | 6.63+6.77 (1H, d, $J = 2.5$ Hz)                | 127.3+127.4, $\text{CH}_{\text{arom}}$            | $\text{C8} \rightarrow \text{H3}(^3\text{J}), \text{H11}(^3\text{J})$                                                                             |
| 9                  | 7.27 (2H, m)                                   | 128.28+128.31, $2 \times \text{CH}_{\text{arom}}$ | $\text{C9} \rightarrow \text{H9}(^3\text{J})$                                                                                                     |
| 10                 | 7.15 +7.21 (2H, m)                             | 128.81+128.86, $2 \times \text{CH}_{\text{arom}}$ | $\text{C10} \rightarrow \text{H1}(^3\text{J}), \text{H10}(^3\text{J})$                                                                            |
| 11                 | 7.13+7.19 (1H, m)                              | 129.30+129.33, $\text{CH}_{\text{arom}}$          | $\text{C11} \rightarrow \text{H8}(^3\text{J})$                                                                                                    |
| 12                 |                                                | 137.34+137.36, $\text{C}_q$                       | $\text{C12} \rightarrow \text{H1}(^2\text{J}), \text{H2}(^3\text{J}), \text{H9}(^3\text{J})$                                                      |
| 13                 |                                                | 154.6, $\text{C}_q$                               | $\text{C13} \rightarrow \text{H3}(^3\text{J}), \text{H4}(^2\text{J}), \text{H8}(^3\text{J}), \text{H11}(^3\text{J}), \text{NH}_\beta(^6\text{J})$ |
| 14                 | -                                              | 155.96+156.07, $\text{C}_q$                       | $\text{C14} \rightarrow \text{H2}(^3\text{J}), \text{H3}(^3\text{J}), \text{NH}_\alpha(^2\text{J})$                                               |
| 15                 | -                                              | 170.1, $\text{C}_q$                               | $\text{C15} \rightarrow \text{H1}(^3\text{J}), \text{H2}(^2\text{J})$                                                                             |
| 16                 | -                                              | 171.87+171.95, $\text{C}_q$                       | $\text{C16} \rightarrow \text{H2}(^6\text{J}), \text{H3}(^2\text{J}), \text{NH}_\alpha(^3\text{J})$                                               |
| $\text{NH}_\alpha$ | 8.48 (1H, s)                                   | -                                                 | -                                                                                                                                                 |
| $\text{NH}_\beta$  | 10.19+10.21 (1H, s)                            | -                                                 | -                                                                                                                                                 |
| COOH               | 13.24 (1H, br)                                 | -                                                 | -                                                                                                                                                 |

Error! Use the Home tab to apply Überschrift 1 to the text that you want to appear here.

---

**Note:** The  $^1\text{H}$ - and  $^{13}\text{C}$ -NMR-spectra show a mixture of rotamers.

**Chemical Formula:**  $\text{C}_{18}\text{H}_{15}\text{ClN}_2\text{O}_5$

**Molecular Weight:** 374.78 g/mol

**IR:**  $\tilde{\nu}[\text{cm}^{-1}]$  = 3854 (w), 3650 (w), 3620 (w), 3600 (w), 3315 (br), 2363 (w), 1772 (w), 1737 (w), 1716 (m), 1694 (vs), 1599 (w), 1559 (w), 1497 (m), 1438 (m), 1426 (m), 1359 (w), 1281 (m), 1203 (m), 1143 (w), 1121 (w), 1017 (w), 959 (w), 932 (s), 906 (w), 821 (m).

**HR-MS:** Theor.  $[\text{M}+\text{H}]^+$ : 375.07422, found: 375.07423.

Theor.  $[\text{M}+\text{Na}]^+$ : 397.05617, found: 397.05640.

**MP:** Decomposition above 190 °C.

**R<sub>f</sub>:** 0.25 ( $\text{SiO}_2$ , 20:1 DCM:MeOH + 1% AcOH).

Error! Use the Home tab to apply Überschrift 1 to the text that you want to appear here.

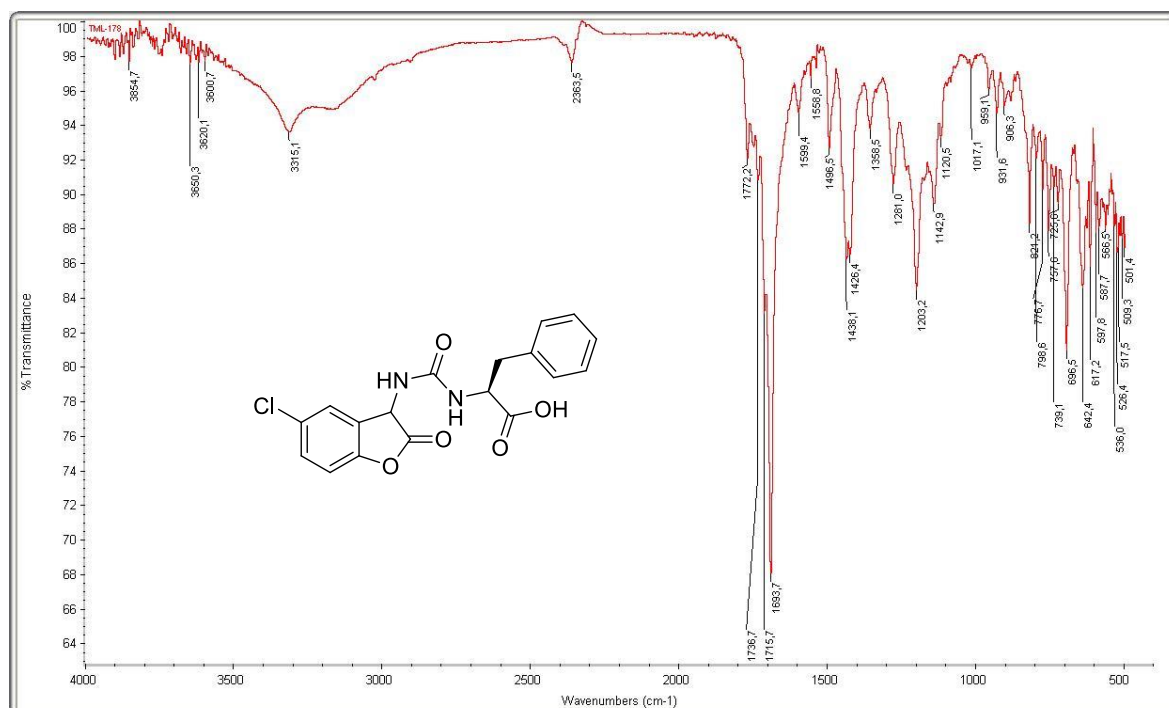

Error! Use the Home tab to apply Überschrift 1 to the text that you want to appear here.

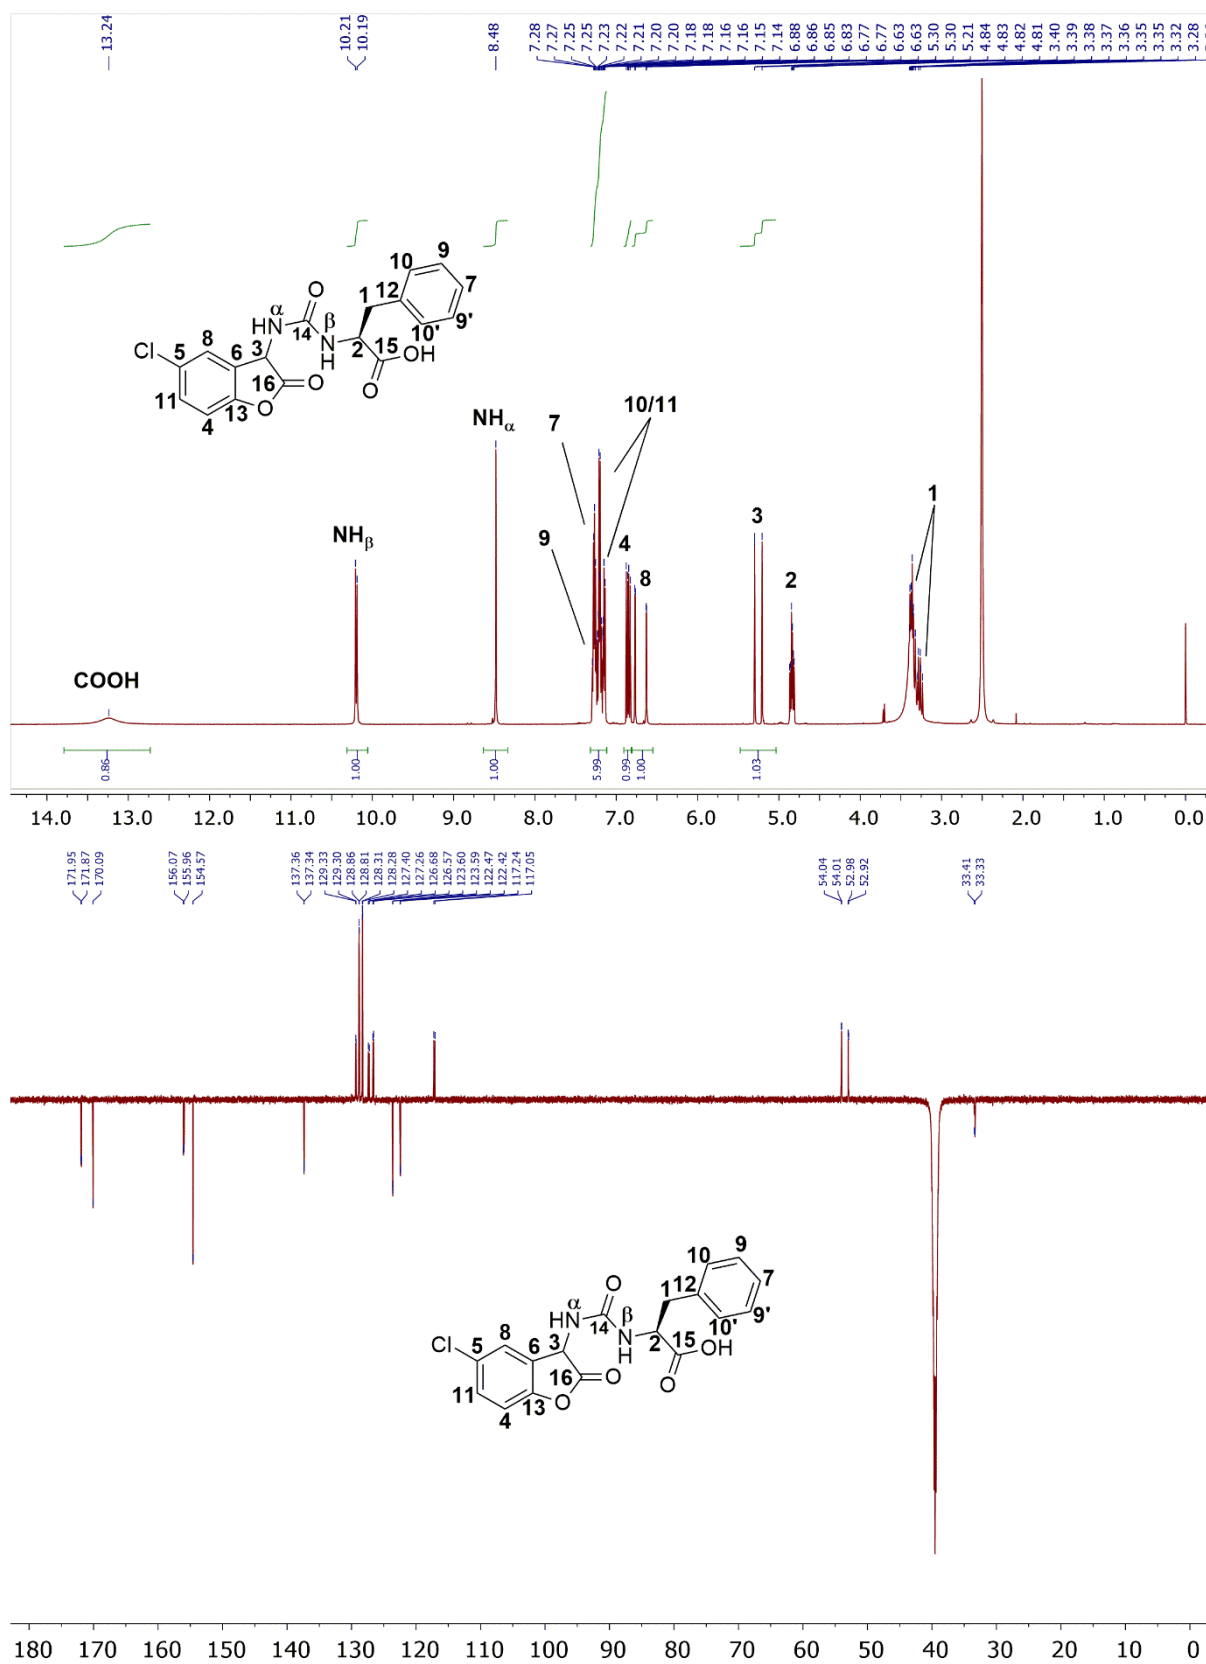

Error! Use the Home tab to apply Überschrift 1 to the text that you want to appear here.

Figure S1: NMR- and IR-spectra of 5A.

## 1.2 NMR and IR spectra of compound 5E

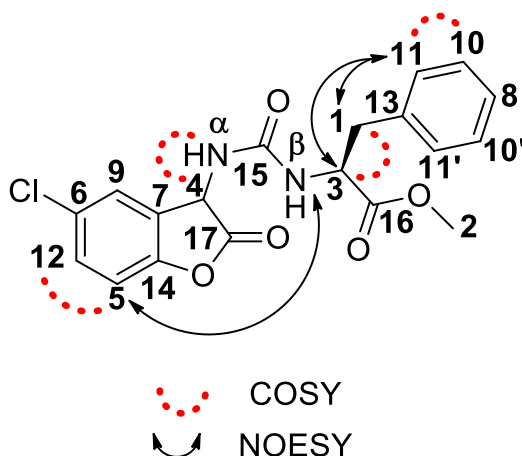

Table S2: 1D and 2D-NMR data of (2S)-methyl 2-(3-(5-chloro-2-oxo-2,3-dihydrobenzofuran-3-yl)ureido)-3-phenylpropanoate (5E) in DMSO- $d_6$ , at 298 K and 500 MHz for  $^1\text{H}$  and 125 MHz for  $^{13}\text{C}$ .

| No.                  | $\delta_{\text{H}}$ [ppm], $J$ in [Hz] | $\delta_{\text{C}}$ [ppm], mult.                     | HMBC ( $^{\circ}\text{J}$ )                                                                                 |
|----------------------|----------------------------------------|------------------------------------------------------|-------------------------------------------------------------------------------------------------------------|
| 1                    | 3.21-3.32 (1H, m)<br>3.38+3.40 (1H, m) | 33.45+33.41, $\text{CH}_2$                           | $\text{C1} \rightarrow \text{H3}^{(2)\text{J}}, \text{H11}^{(3)\text{J}}$                                   |
| 2                    | 3.70+3.72 (3H, s)                      | 52.62+52.56, $\text{CH}_3$                           | -                                                                                                           |
| 3                    | 4.95-5.00 (1H, m)                      | 52.66, CH                                            | $\text{C3} \rightarrow \text{H1}^{(2)\text{J}},$                                                            |
| 4                    | 5.19+5.30 (1H, d, $J = 1.1$ Hz)        | 54.5+54.4, CH                                        | $\text{C4} \rightarrow \text{H5}^{(4)\text{J}}, \text{H9}^{(3)\text{J}}, \text{NH}_{\alpha}^{(2)\text{J}}$  |
| 5                    | 6.84+6.86 (1H, d, $J = 8.7$ Hz)        | 117.3+117.1, $\text{CH}_{\text{arom}}$               | $\text{C5} \rightarrow \text{NH}_{\beta}^{(7)\text{J}}$                                                     |
| 6                    |                                        | 122.45+122.42, $\text{C}_q$                          | $\text{C6} \rightarrow \text{H5}^{(3)\text{J}}, \text{H9}^{(2)\text{J}}, \text{H12}^{(2)\text{J}}$          |
| 7                    |                                        | 123.51+123.50, $\text{C}_q$                          | $\text{C7} \rightarrow \text{H4}^{(2)\text{J}}, \text{H5}^{(3)\text{J}}, \text{NH}_{\beta}^{(5)\text{J}}$   |
| 8                    | 7.23 (1H, m)                           | 126.8+126.7, $\text{CH}_{\text{arom}}$               | $\text{C8} \rightarrow \text{H11}^{(3)\text{J}}$                                                            |
| 9                    | 6.67+6.82 (1H, d, $J = 2.7$ Hz)        | 127.8+127.6, $\text{CH}_{\text{arom}}$               | $\text{C9} \rightarrow \text{H4}^{(3)\text{J}}, \text{H12}^{(3)\text{J}}$                                   |
| 10                   | 7.27 (2H, m)                           | 128.36+128.35,<br>$2 \times \text{CH}_{\text{arom}}$ | $\text{C10} \rightarrow \text{H10}^{(3)\text{J}}$                                                           |
| 11                   | 7.16+7.21 (2H, m)                      | 128.97+128.93,<br>$2 \times \text{CH}_{\text{arom}}$ | $\text{C11} \rightarrow \text{H1}^{(3)\text{J}}, \text{H11}^{(3)\text{J}}$                                  |
| 12                   | 7.21 (1H, m)                           | 129.45+129.42, $\text{CH}_{\text{arom}}$             | $\text{C12} \rightarrow \text{H9}^{(3)\text{J}}$                                                            |
| 13                   | -                                      | 136.92+136.89, $\text{C}_q$                          | $\text{C13} \rightarrow \text{H1}^{(2)\text{J}}, \text{H10}^{(3)\text{J}}$                                  |
| 14                   | -                                      | 154.64+154.63, $\text{C}_q$                          | $\text{C14} \rightarrow \text{H9}^{(3)\text{J}}, \text{H12}^{(3)\text{J}}, \text{NH}_{\beta}^{(6)\text{J}}$ |
| 15                   | -                                      | 155.9+155.7, $\text{C}_q$                            | $\text{C15} \rightarrow \text{H3}^{(3)\text{J}}, \text{H4}^{(3)\text{J}}, \text{NH}_{\alpha}^{(2)\text{J}}$ |
| 16                   | -                                      | 169.14+169.07, $\text{C}_q$                          | $\text{C16} \rightarrow \text{H1}^{(3)\text{J}}, \text{H2}^{(3)\text{J}}, \text{H3}^{(2)\text{J}}$          |
| 17                   | -                                      | 171.9+171.8, $\text{C}_q$                            | $\text{C17} \rightarrow \text{H3}^{(6)\text{J}}, \text{H4}^{(2)\text{J}}, \text{NH}_{\alpha}^{(3)\text{J}}$ |
| $\text{NH}_{\alpha}$ | 8.52 (1H, s)                           |                                                      |                                                                                                             |
| $\text{NH}_{\beta}$  | 10.17+10.18 (1H, s)                    |                                                      |                                                                                                             |

Error! Use the Home tab to apply Überschrift 1 to the text that you want to appear here.

---

**Note:** The  $^1\text{H}$ - and  $^{13}\text{C}$ -NMR-spectra show a mixture of rotamers.

**Chemical Formula:**  $\text{C}_{19}\text{H}_{17}\text{ClN}_2\text{O}_5$

**Molecular Weight:** 388.80 g/mol

**IR:**  $\tilde{\nu}$  [ $\text{cm}^{-1}$ ] = 3325 (w), 2955 (w), 2330 (w), 1773 (w), 1705 (s), 1647 (w), 1635 (w), 1597 (w), 1556 (w), 1541 (w), 1497 (w), 1454 (w), 1430 (m), 1363 (w), 1326 (w), 1279 (m), 1249 (w), 1204 (w), 1175 (w), 1118 (w), 1032 (w), 996 (w), 967 (w), 960 (w), 950 (w), 907 (w), 879 (w), 816 (w).

**HR-MS:** Theor.  $[\text{M}+\text{H}]^+$ : 398.08987, found: 397.08991.

Theor.  $[\text{M}+\text{Na}]^+$ : 411.07182, found: 411.07179.

**MP:** 206 °C.

**R<sub>f</sub>:** 0.35 ( $\text{SiO}_2$ , 20:1 DCM:MeOH).

Error! Use the Home tab to apply Überschrift 1 to the text that you want to appear here.

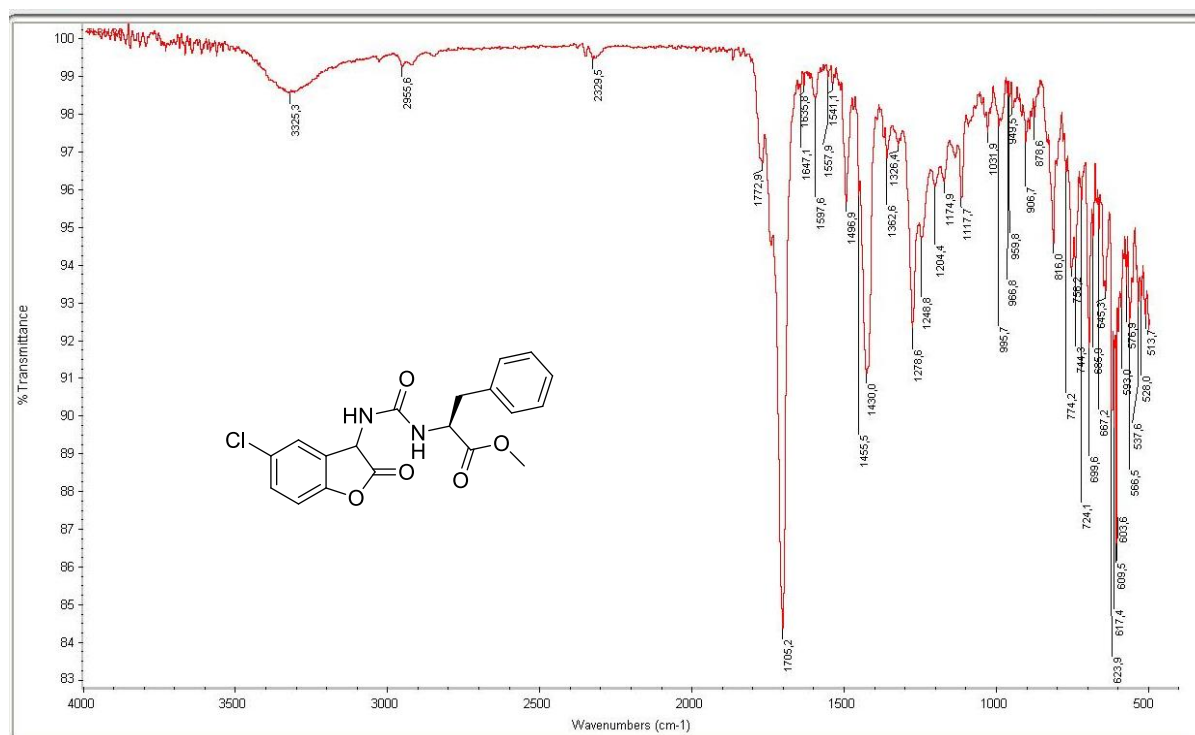

Error! Use the Home tab to apply Überschrift 1 to the text that you want to appear here.

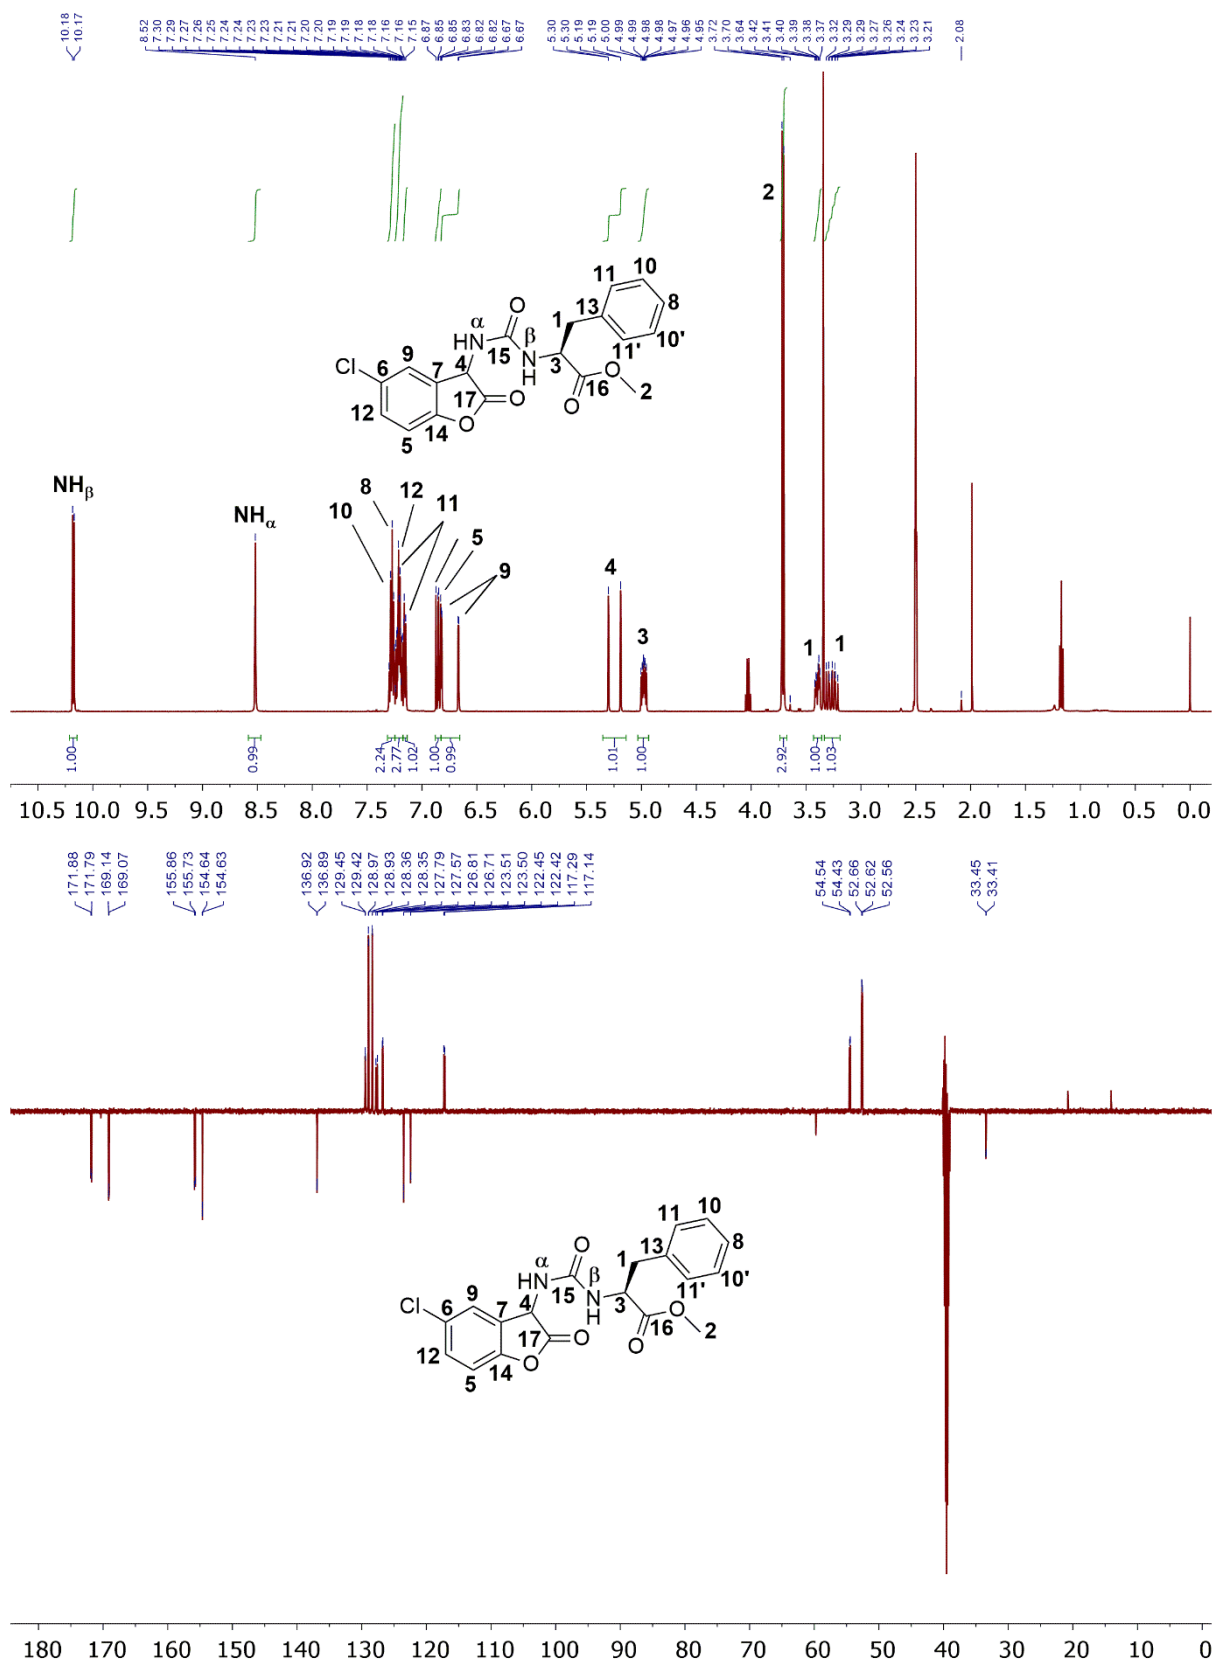

Figure S2: NMR- and IR-spectra of 5E.

### 1.3 NMR and IR spectra of compound 6

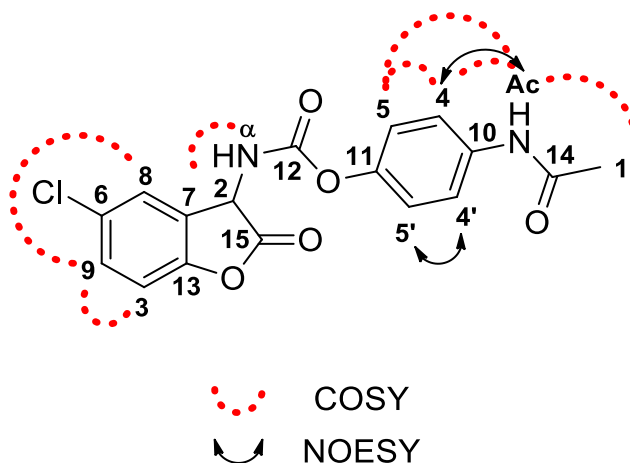

**Table 3:** 1D and 2D-NMR data of 4-acetamidophenyl (5-chloro-2-oxo-2,3-dihydrobenzofuran-3-yl)carbamate (6) in DMSO-d<sub>6</sub>, at 298 K and 500 MHz for <sup>1</sup>H and 125 MHz for <sup>13</sup>C.

| No.              | $\delta_H$ [ppm], $J$ in [Hz]    | $\delta_C$ [ppm], mult.     | HMBC ( $\times J$ )                                                              |
|------------------|----------------------------------|-----------------------------|----------------------------------------------------------------------------------|
| 1                | 2.03 (3H, s)                     | 23.9, CH <sub>3</sub>       | -                                                                                |
| 2                | 5.37 (1H, d, $J$ = 8.2 Hz)       | 53.0, CH                    | C2→H3( <sup>4</sup> J), H8( <sup>3</sup> J), NH <sub>α</sub> ( <sup>2</sup> J)   |
| 3                | 6.84 (1H, d, $J$ = 8.7 Hz)       | 117.5, CH <sub>arom</sub>   | C3→H8( <sup>4</sup> J)                                                           |
| 4                | 7.56 (2H, d, $J$ = 8.9 Hz)       | 119.8, 2xCH <sub>arom</sub> | C4→H4( <sup>3</sup> J), H5( <sup>2</sup> J), NH <sub>Ac</sub> ( <sup>3</sup> J)  |
| 5                | 7.03 (2H, d, $J$ = 9.0 Hz)       | 121.9, 2xCH <sub>arom</sub> | C5→H4( <sup>2</sup> J), H5( <sup>3</sup> J)                                      |
| 6                | -                                | 122.2, C <sub>q</sub>       | C6→H3( <sup>3</sup> J), H8( <sup>2</sup> J), H9( <sup>2</sup> J)                 |
| 7                | -                                | 126.7, C <sub>q</sub>       | C7→H2( <sup>2</sup> J), H3( <sup>3</sup> J)                                      |
| 8                | 7.27 (1H, d, $J$ = 2.7 Hz)       | 127.1, CH <sub>arom</sub>   | C8→H9( <sup>3</sup> J)                                                           |
| 9                | 7.16 (1H, dd, $J$ = 8.7, 2.7 Hz) | 128.3, CH <sub>arom</sub>   | C9→H8( <sup>3</sup> J)                                                           |
| 10               | -                                | 136.4, C <sub>q</sub>       | C10→H4( <sup>2</sup> J), H5( <sup>3</sup> J), NH <sub>Ac</sub> ( <sup>2</sup> J) |
| 11               | -                                | 146.2, C <sub>q</sub>       | C11→H4( <sup>3</sup> J), H5( <sup>2</sup> J)                                     |
| 12               | -                                | 154.2, C <sub>q</sub>       | C12→H2( <sup>3</sup> J), NH <sub>α</sub> ( <sup>2</sup> J)                       |
| 13               | -                                | 154.4, C <sub>q</sub>       | C13→H3( <sup>2</sup> J), H8( <sup>3</sup> J), H9( <sup>3</sup> J)                |
| 14               | -                                | 168.2, C <sub>q</sub>       | C14→H1( <sup>2</sup> J), NH <sub>Ac</sub> ( <sup>2</sup> J)                      |
| 15               | -                                | 171.71, C <sub>q</sub>      | C15→H2( <sup>2</sup> J)                                                          |
| NH <sub>α</sub>  | 8.11 (1H, d, $J$ = 8.2 Hz)       | -                           | -                                                                                |
| NH <sub>Ac</sub> | 9.97 (1H, s)                     | -                           | -                                                                                |

**Chemical Formula:** C<sub>17</sub>H<sub>13</sub>ClN<sub>2</sub>O<sub>5</sub>

Error! Use the Home tab to apply Überschrift 1 to the text that you want to appear here.

**Molecular Weight:** 360.75 g/mol

**IR:**  $\tilde{\nu}$  [cm<sup>-1</sup>] = 3303 (br), 2923 (w), 2854 (w), 2360 (w), 2343 (w), 1717 (m), 1667 (w), 1609 (w), 1540 (w), 1496 (s), 1409 (w), 1372 (w), 1320 (w), 1278 (w), 1203 (vs), 1111 (w), 1028 (m), 1018 (m), 992 (w), 971 (w), 940 (w), 925 (w), 917 (w), 845 (w), 821 (m).

**MP:** Change of colour: 148 °C; Melting at 175 °C.

**R<sub>f</sub>:** 0.10 (SiO<sub>2</sub>, 8:1 DCM:MeOH).

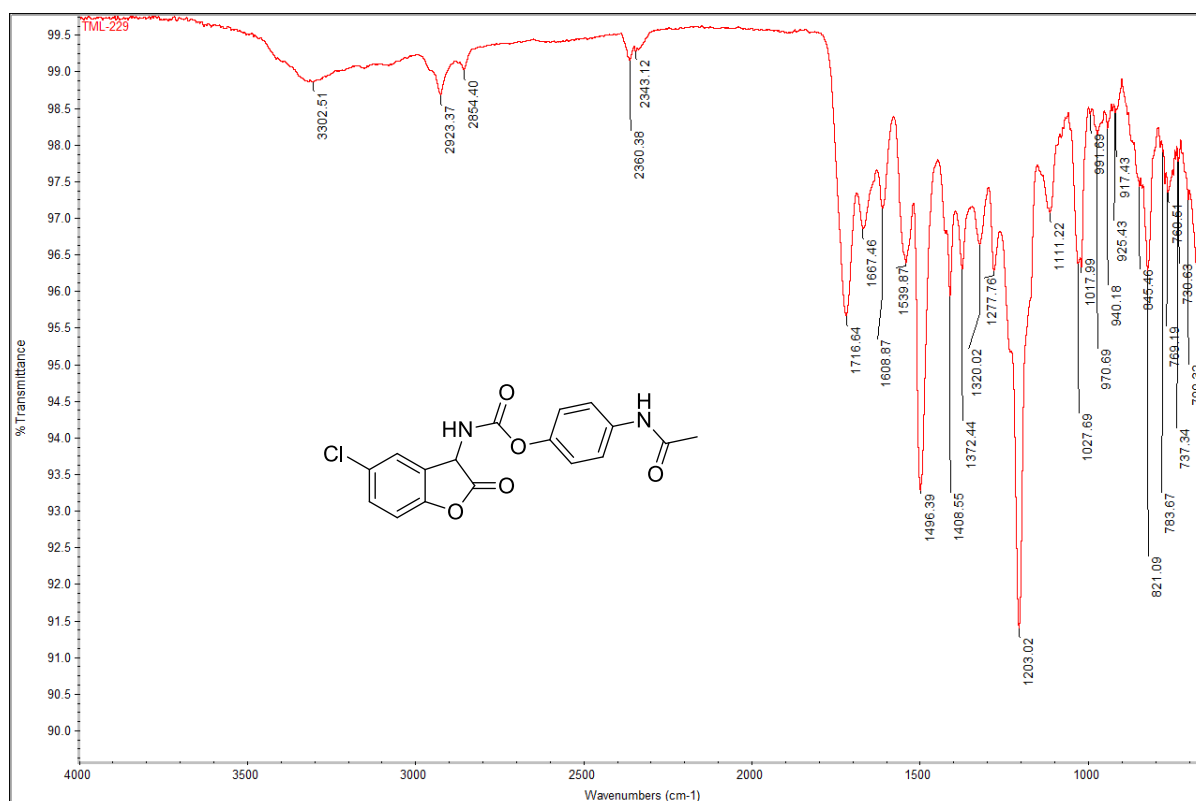

Error! Use the Home tab to apply Überschrift 1 to the text that you want to appear here.

---

Error! Use the Home tab to apply Überschrift 1 to the text that you want to appear here.

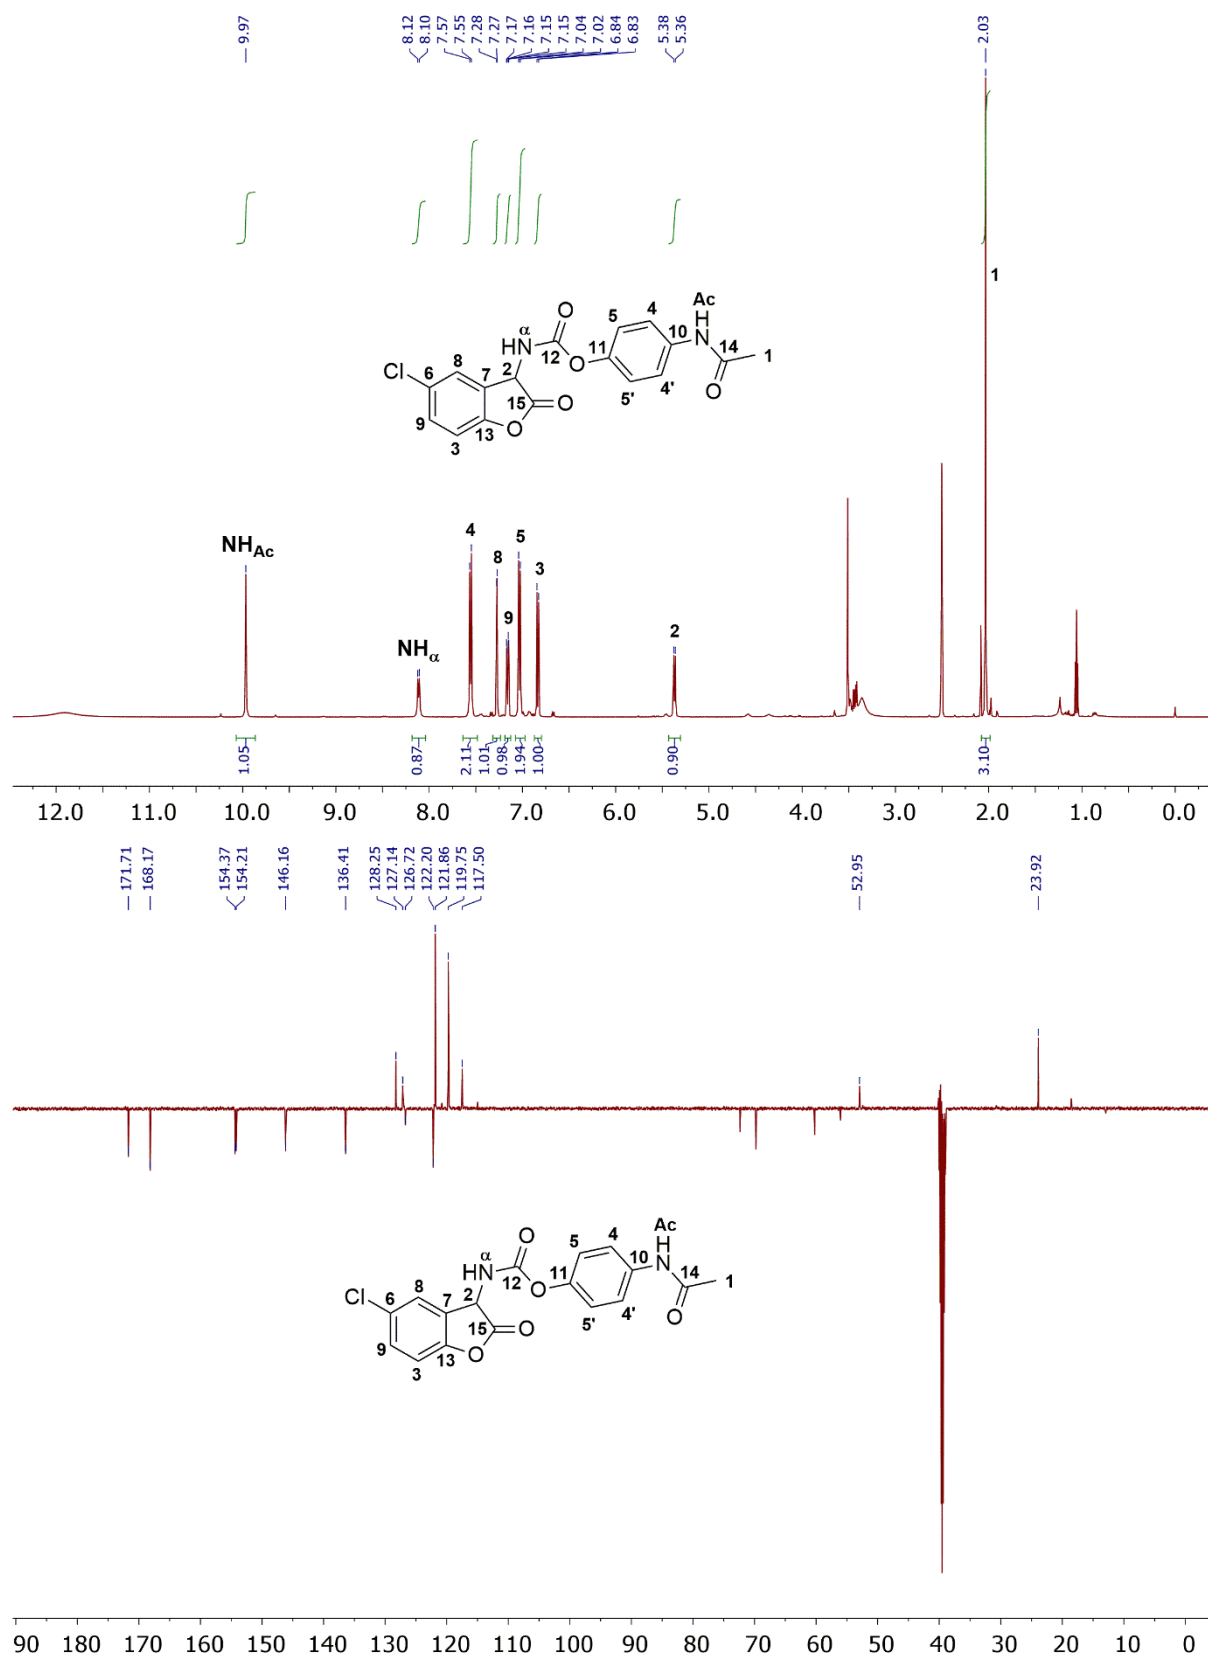

Error! Use the Home tab to apply Überschrift 1 to the text that you want to appear here.

Figure S3: NMR- and IR-spectra of 6.

#### 1.4 NMR and IR spectra of compound 8

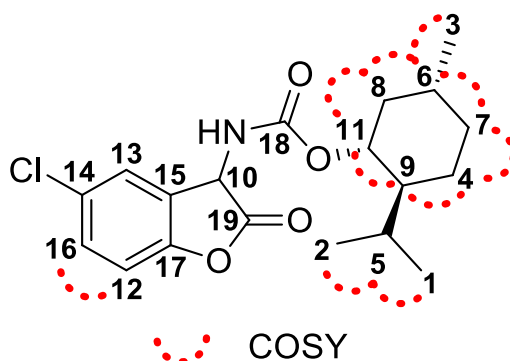

**Table S4:** 1D and 2D-NMR data of (1*R*,2*S*,5*R*)-2-isopropyl-5-methylcyclohexyl (5-chloro-2-oxo-2,3-dihydrobenzofuran-3-yl)carbamate (8) in CDCl<sub>3</sub>, at 298 K and 500 MHz for <sup>1</sup>H and 125 MHz for <sup>13</sup>C.

| No. | $\delta_H$ [ppm], <i>J</i> in [Hz] | $\delta_C$ [ppm], mult.           | HMBC ( $\times J$ )                                                  |
|-----|------------------------------------|-----------------------------------|----------------------------------------------------------------------|
| 1   | 0.74-0.80 (3H, s)                  | 16.5, CH <sub>3</sub>             | C1→H2( <sup>3</sup> J)                                               |
| 2   | 0.90 (3H, m)                       | 20.85+20.88, CH <sub>3</sub>      | C2→H1( <sup>3</sup> J)                                               |
| 3   | 0.89 (3H, m)                       | 22.0, CH <sub>3</sub>             | C3→H8( <sup>3</sup> J)                                               |
| 4   | 1.04 (1H, m); 1.67 (1H, m)         | 23.7, CH <sub>2</sub>             | -                                                                    |
| 5   | 1.89 (1H, m)                       | 26.5, CH                          | C5→H1( <sup>2</sup> J), H2( <sup>2</sup> J)                          |
| 6   | 1.43 (1H, m)                       | 31.5, CH                          | C6→H3( <sup>2</sup> J), H7( <sup>2</sup> J), H8( <sup>2</sup> J)     |
| 7   | 0.84 (1H, m); 1.65 (1H, m)         | 34.3, CH <sub>2</sub>             | C7→H3( <sup>3</sup> J), H8( <sup>3</sup> J)                          |
| 8   | 0.98 (1H, m); 1.99 (1H, m)         | 41.2, CH <sub>2</sub>             | C8→H3( <sup>3</sup> J)                                               |
| 9   | 1.33 (1H, m)                       | 47.4+47.5, CH                     | C9→H1( <sup>3</sup> J), H2( <sup>3</sup> J)                          |
| 10  | 5.20-5.60 (1H, br)                 | 52.4+52.8, CH                     | C10→H12( <sup>4</sup> J), H13( <sup>3</sup> J)                       |
| 11  | 4.53 (1H, m)                       | 76.9, CH                          | C11→H8( <sup>2</sup> J), H9( <sup>2</sup> J)                         |
| 12  | 7.05 (1H, d, <i>J</i> = 8.3 Hz)    | 112.3+112.4, CH <sub>arom</sub>   | C12→H13( <sup>4</sup> J)                                             |
| 13  | 7.34 (1H, m)                       | 124.85+124.94, CH <sub>arom</sub> | C13→H16( <sup>3</sup> J)                                             |
| 14  | -                                  | 126.6, C <sub>q</sub>             | C14→H12( <sup>3</sup> J)                                             |
| 15  | -                                  | 130.10+130.12, C <sub>q</sub>     | C15→H12( <sup>3</sup> J), H16( <sup>4</sup> J)                       |
| 16  | 7.33 (1H, m)                       | 130.4, CH <sub>arom</sub>         | C16→H13( <sup>3</sup> J)                                             |
| 17  | -                                  | 152.19+152.24, C <sub>q</sub>     | C17→H12( <sup>2</sup> J), H13( <sup>3</sup> J), H16( <sup>3</sup> J) |
| 18  | -                                  | 155.9, C <sub>q</sub>             | C18→H10( <sup>3</sup> J)                                             |
| 19  | -                                  | 172.9+173.0, C <sub>q</sub>       | C19→H10( <sup>2</sup> J)                                             |

**Note:** The <sup>1</sup>H- and <sup>13</sup>C-NMR-spectra show a mixture of rotamers.

Error! Use the Home tab to apply Überschrift 1 to the text that you want to appear here.

---

|                                 |                                                                                                                                                                                                                                                                                                                                                                                                        |
|---------------------------------|--------------------------------------------------------------------------------------------------------------------------------------------------------------------------------------------------------------------------------------------------------------------------------------------------------------------------------------------------------------------------------------------------------|
| <b><u>Chemical Formula:</u></b> | C <sub>19</sub> H <sub>24</sub> ClNO <sub>4</sub>                                                                                                                                                                                                                                                                                                                                                      |
| <b><u>Molecular Weight:</u></b> | 365.85 g/mol                                                                                                                                                                                                                                                                                                                                                                                           |
| <b><u>IR:</u></b>               | $\tilde{\nu}$ [cm <sup>-1</sup> ] = 3366 (br), 2955 (w), 2871 (w), 2843 (w), 2360 (w), 2340 (w), 1832 (s), 1686 (vs), 1653 (w), 1616 (w), 1558 (w), 1529 (s), 1472 (s), 1458 (w), 1432 (w), 1388 (w), 1369 (w), 1332 (w), 1299 (w), 1285 (w), 1275 (w), 1263 (m), 1221 (w), 1200 (w), 1183 (w), 1157 (w), 1070 (s), 1016 (m), 1003 (w), 988 (w), 975 (w), 925 (w), 912 (w), 888 (w), 857 (w), 832 (m). |
| <b><u>HR-MS:</u></b>            | Theor. [M+Na] <sup>+</sup> : 388.12860, found: 388.12883.                                                                                                                                                                                                                                                                                                                                              |
| <b><u>Melting Point:</u></b>    | 172 °C.                                                                                                                                                                                                                                                                                                                                                                                                |
| <b><u>R<sub>f</sub>:</u></b>    | 0.27 (SiO <sub>2</sub> , 100:1 Toluene:MeOH + 1% AcOH).                                                                                                                                                                                                                                                                                                                                                |

Error! Use the Home tab to apply Überschrift 1 to the text that you want to appear here.

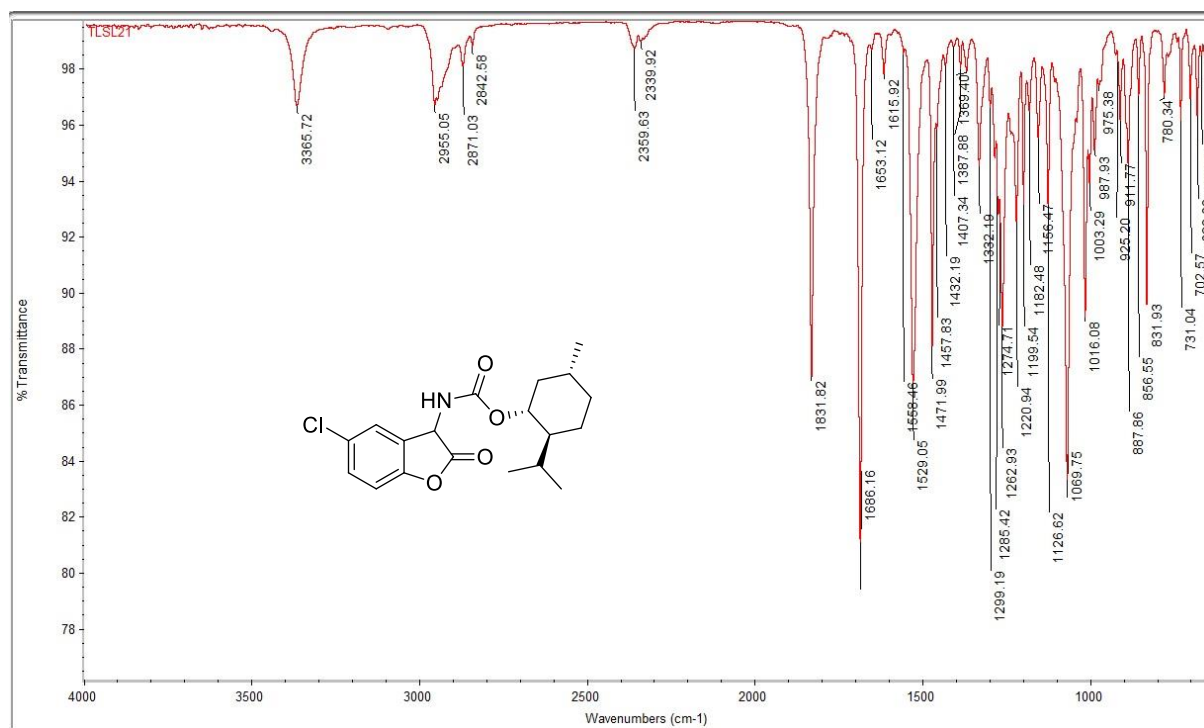

Error! Use the Home tab to apply Überschrift 1 to the text that you want to appear here.

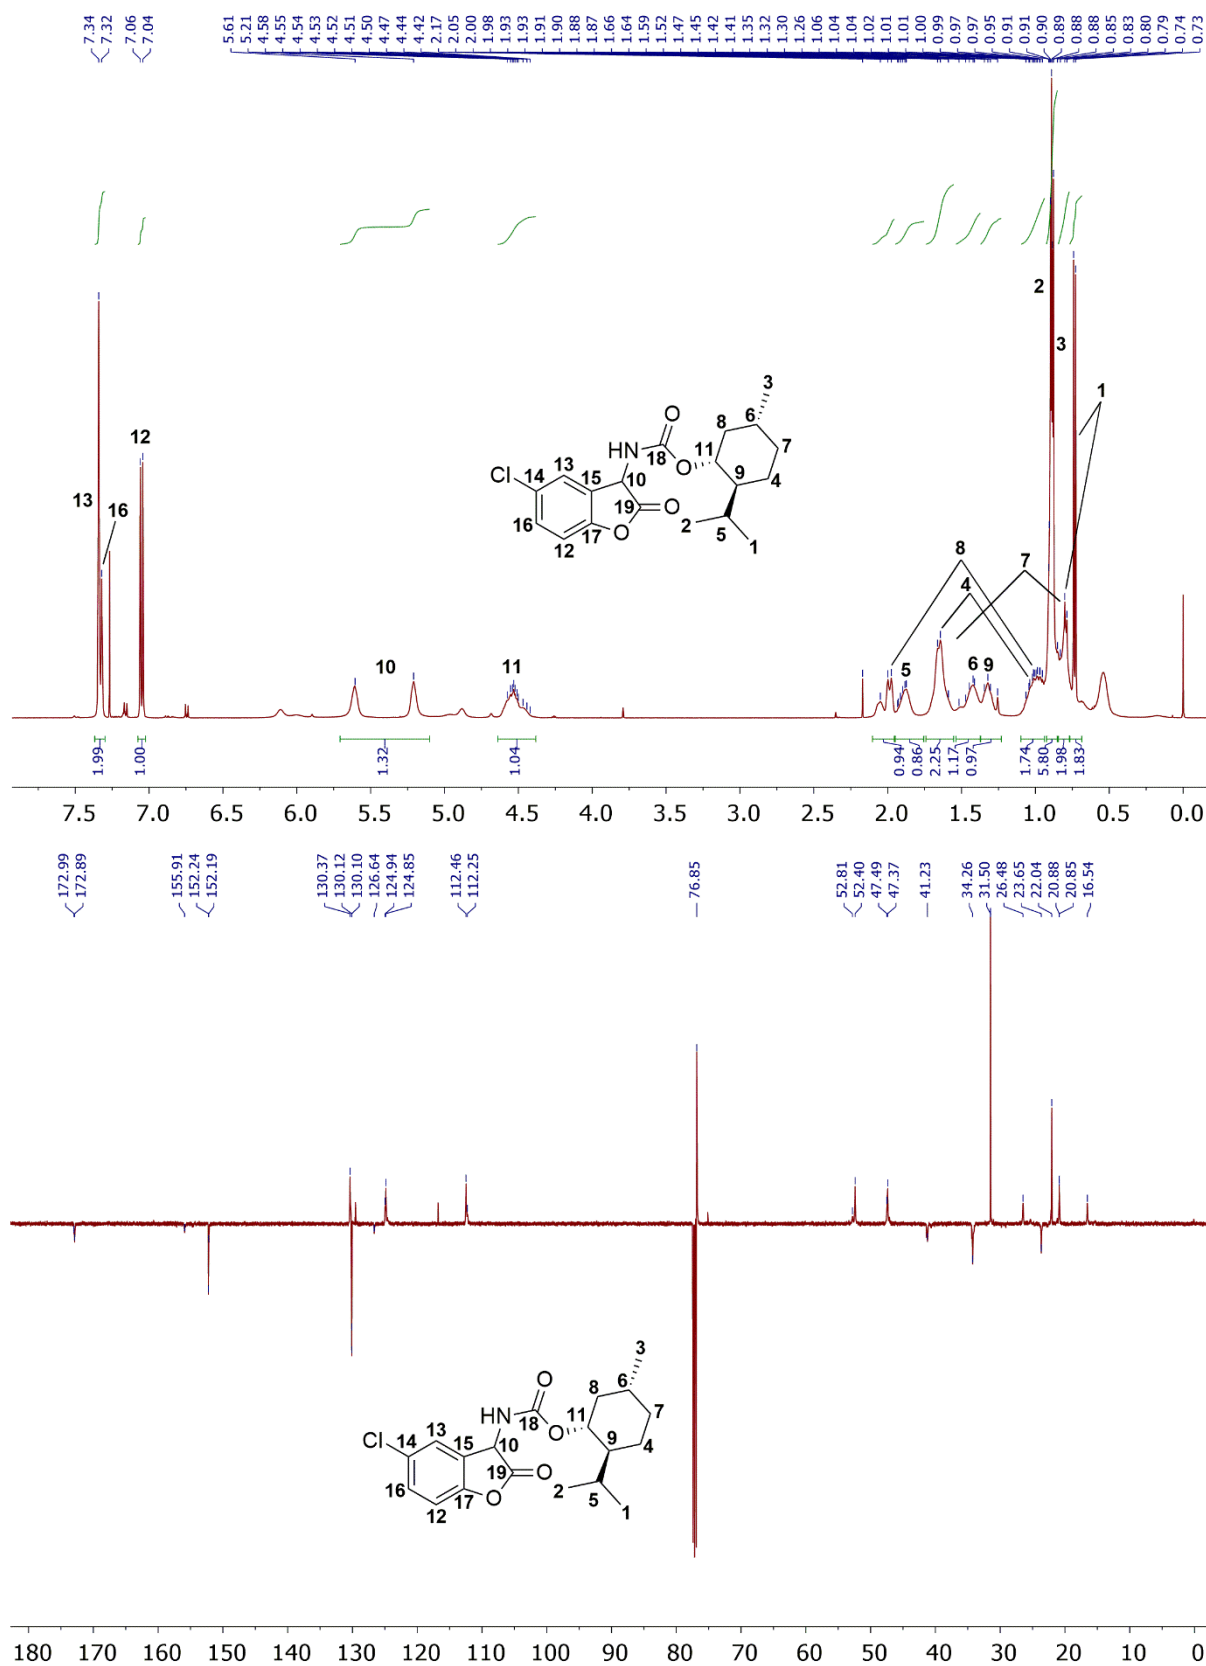

Figure S4: NMR- and IR-spectra of 8.

## 2. Decomposition Experiments

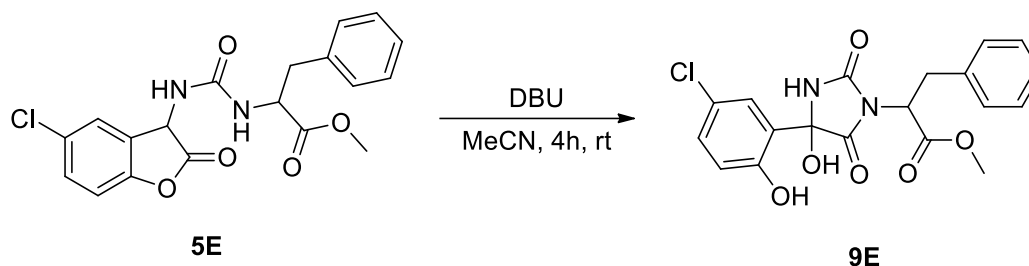

**Decomposition experiment 5E-DE:** 200 mg (0.51 mmol, 1.0 eq.) of **5E** were dissolved in 10.0 ml MeCN and 0.15 ml (1.03 mmol, 2.0 eq.) of DBU were added. At the begin of the addition a small flash of blue light could be seen and the clear mixture slowly turned orange and then dark brown. After 4 hours the solvent was removed under reduced pressure and 10 ml of water were added to the crude product. The aqueous phase was extracted three times with ethylacetate (20 ml per extraction) and the combined organic layers were washed four times with water and subsequently dried over sodium sulfate. Finally, the solvent was removed under reduced pressure and 50 mg of a brownish solid were obtained, which were analysed via NMR-spectroscopy and ESI-MS.

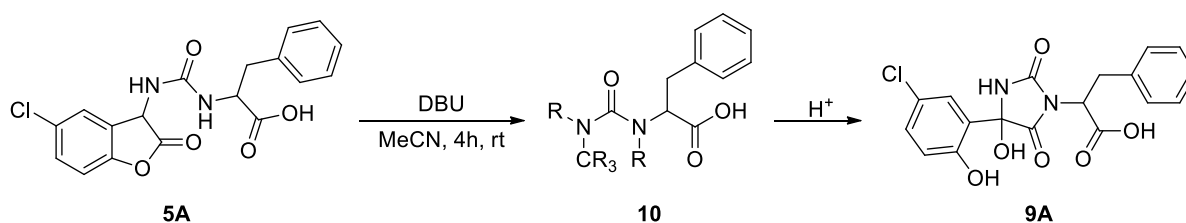

**Decomposition experiment 5A-DE:** 200 mg (0.53 mmol, 1.0 eq.) of **5A** were dissolved in 10.0 ml MeCN and 0.16 ml (1.07 mmol, 2.0 eq.) of DBU were added. At the begin of the addition a small flash of blue light could be seen and the clear

mixture slowly turned orange and then dark brown. After 4 hours the solvent was removed under reduced pressure. 10 ml of water and 1.0 ml of 2 M HCl solution were added to the crude product, which then changed its colour to orange. The aqueous phase was extracted three times with ethylacetate (20 ml per extraction) and the combined organic layers dried over sodium sulfate. Finally, the solvent was removed under reduced pressure. 22 mg of a brownish, orange solid was obtained, which were analysed via NMR.

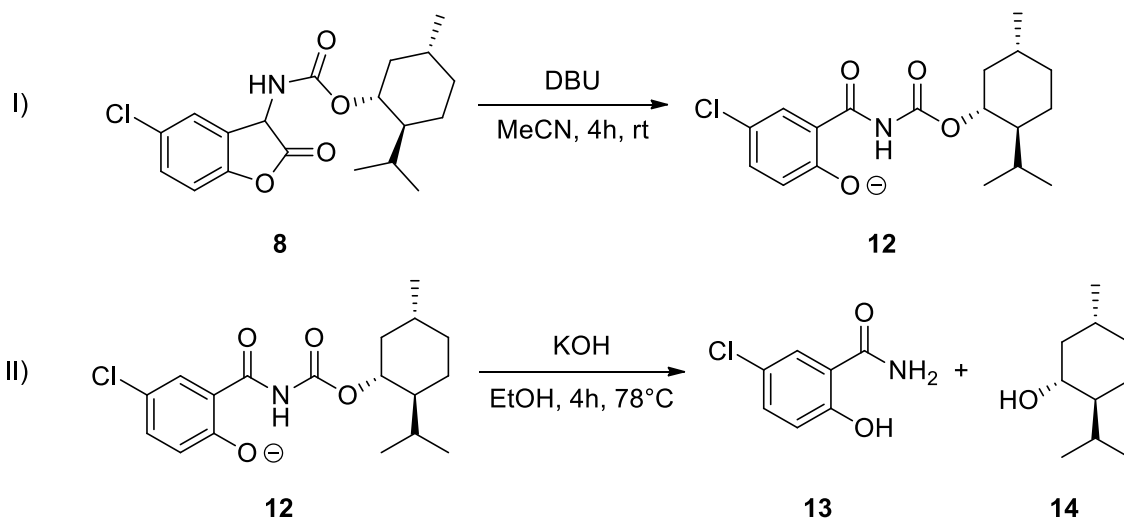

**Decomposition experiment 8-DE:** 50 mg (0.14 mmol, 1.0 eq.) of **6** were dissolved in 5.0 ml MeCN and 42  $\mu$ l (0.28 mmol, 2.0 eq.) of DBU were added. Over a time period of 20 minutes a strong emission of blue light could be seen and the clear mixture slowly turned yellow, then orange and finally dark red. After 4 hours the solvent was removed under reduced pressure and 10 ml of water and ethylacetate were added to the crude product. The organic phase was washed four times with water and subsequently dried over sodium sulfate. Finally, the solvent was removed under reduced pressure and 45 mg of a colourless solid were obtained, which was analysed via NMR. After compound **12** was verified, it was dissolved in 5 ml EtOH and 24 mg

Error! Use the Home tab to apply Überschrift 1 to the text that you want to appear here.

---

KOH (0.42 mmol, 3.0 eq.) were added and the solution was refluxed for 4 hours. After that the solvent was removed under reduced pressure and 10 ml of water were added to the crude product. The aqueous phase was extracted three times with ethylacetate (15 ml per extraction) and the combined organic layers were washed with brine and subsequently dried over sodium sulfate. Finally, the solvent was removed under reduced pressure and 20 mg (0.11 mmol, 79% minus the contamination by 5-chlorosalicylamide **13**) of L-menthol **14** were obtained.

Error! Use the Home tab to apply Überschrift 1 to the text that you want to appear here.

## 2.1 NMR and ESI-spectra of 5E

### Results from Experiment 5E-DE (Mainproduct)

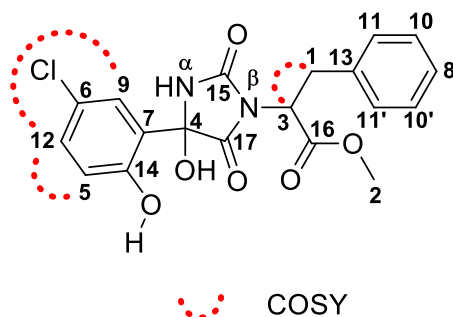

**Table S4:** 1D and 2D-NMR data of methyl 2-(4-(5-chloro-2-hydroxyphenyl)-4-hydroxy-2,5-dioxoimidazolidin-1-yl)-3-phenylpropanoate (9E) in DMSO- $d_6$ , at 298 K and 499 MHz for  $^1\text{H}$  and 126 MHz for  $^{13}\text{C}$ .

| No.                | $\delta_{\text{H}}$ [ppm], $J$ in [Hz]                                  | $\delta_{\text{C}}, \delta_{\text{N}}$ [ppm], mult.  | HMBC ( $\times J$ )                                                                      |
|--------------------|-------------------------------------------------------------------------|------------------------------------------------------|------------------------------------------------------------------------------------------|
| 1                  | 3.04 (1H, dd, $J = 14.2, 1.6$ Hz)<br>+3.45 (1H, dd, $J = 14.2, 7.2$ Hz) | 33.38+33.61, $\text{CH}_2$                           | $\text{C1} \rightarrow \text{H3}^{(2J)}, \text{H11}^{(3J)}$                              |
| 2                  | 3.64 (3H, s)                                                            | 52.30+52.32, $\text{CH}_3$                           | -                                                                                        |
| 3                  | 4.78 (1H, dd, $J = 7.8, 1.8$ Hz)                                        | 52.7, CH                                             | $\text{C3} \rightarrow \text{H1}^{(2J)},$                                                |
| 4                  | -                                                                       | 81.76+81.92, $\text{C}_q$                            | $\text{C4} \rightarrow \text{H5}^{(4J)}, \text{H9}^{(3J)}, \text{NH}_\alpha^{(2J)}$      |
| 5                  | 6.80 (1H, d, $J = 8.6$ Hz)                                              | 117.1, $\text{CH}_{\text{arom}}$                     | -                                                                                        |
| 6                  | -                                                                       | 122.0, $\text{C}_q$                                  | $\text{C6} \rightarrow \text{H5}^{(3J)}, \text{H9}^{(2J)}, \text{H12}^{(2J)}$            |
| 7                  | -                                                                       | 126.25+126.33, $\text{C}_q$                          | $\text{C7} \rightarrow \text{H5}^{(3J)}$                                                 |
| 8                  | 7.20 (1H, m)                                                            | 126.5, $\text{CH}_{\text{arom}}$                     | $\text{C8} \rightarrow \text{H11}^{(3J)}$                                                |
| 9                  | 7.49 (1H, d, $J = 2.6$ Hz)                                              | 127.37, $\text{CH}_{\text{arom}}$                    | $\text{C9} \rightarrow \text{H12}^{(3J)}$                                                |
| 10                 | 7.27 (2H, m)                                                            | 128.31+128.34,<br>$2 \times \text{CH}_{\text{arom}}$ | $\text{C10} \rightarrow \text{H10}^{(3J)}$                                               |
| 11                 | 7.25 (2H, m)                                                            | 129.02+129.07,<br>$2 \times \text{CH}_{\text{arom}}$ | $\text{C11} \rightarrow \text{H1}^{(3J)}, \text{H8}^{(3J)}, \text{H11}^{(3J)}$           |
| 12                 | 7.24 (1H, m)                                                            | 129.5, $\text{CH}_{\text{arom}}$                     | $\text{C12} \rightarrow \text{H9}^{(3J)}$                                                |
| 13                 | -                                                                       | 137.7, $\text{C}_q$                                  | $\text{C13} \rightarrow \text{H1}^{(2J)}, \text{H10}^{(3J)}$                             |
| 14                 | -                                                                       | 153.48+153.54, $\text{C}_q$                          | $\text{C14} \rightarrow \text{H5}^{(2J)}, \text{H9}^{(3J)}, \text{H12}^{(3J)}$           |
| 15                 | -                                                                       | 154.93+154.97, $\text{C}_q$                          | $\text{C15} \rightarrow \text{H3}^{(3J)}, \text{NH}_\alpha^{(2J)}$                       |
| 16                 | -                                                                       | 168.92+169.04, $\text{C}_q$                          | $\text{C16} \rightarrow \text{H1}^{(3J)}, \text{H2}^{(3J)}, \text{H3}^{(2J)}$            |
| 17                 | -                                                                       | 172.16+172.29, $\text{C}_q$                          | $\text{C17} \rightarrow \text{H3}^{(3J)}, \text{NH}_\alpha^{(3J)}$                       |
| $\text{NH}_\alpha$ | 8.86+8.83 (1H, s)                                                       | 112.6, NH                                            | -                                                                                        |
| $\text{N}_\beta$   | -                                                                       | 147.8, $\text{NR}_3$                                 | $\text{N}_\beta \rightarrow \text{H1}^{(3J)}, \text{H3}^{(2J)}, \text{NH}_\alpha^{(3J)}$ |
| Ph-OH              | 10.13 (1H, br)                                                          | -                                                    | -                                                                                        |

Error! Use the Home tab to apply Überschrift 1 to the text that you want to appear here.

**Chemical Formula:** C<sub>19</sub>H<sub>17</sub>ClN<sub>2</sub>O<sub>6</sub>

**Molecular Weight:** 404.80 g/mol

**MS (ESI):** m/z (%) 427.0668 [M+Na<sup>+</sup>] (27), 409.556 [M+Na<sup>+</sup>-H<sub>2</sub>O] (100).

TML\_284b #1-60 RT: 0.01-0.47 AV: 60 NL: 1.45E7  
T: FTMS + c ESI Full ms [100.00-1000.00]

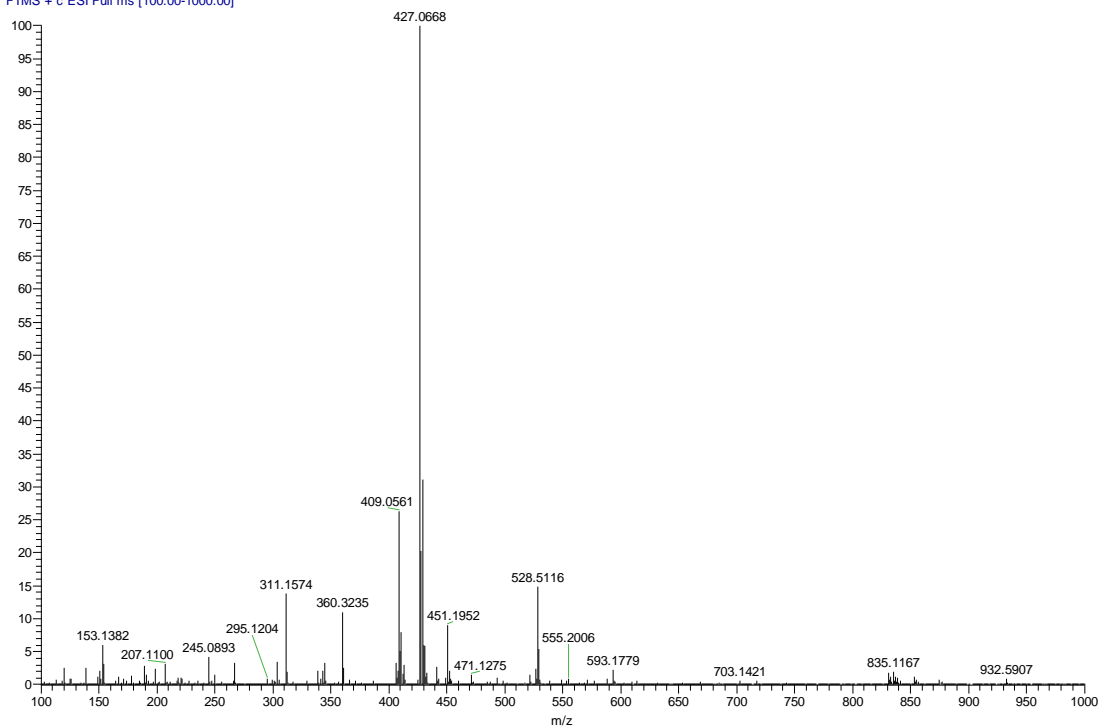

TML\_284b@CID #1-58 RT: 0.01-0.64 AV: 58 NL: 4.07E6  
T: FTMS + c ESI Full ms2 427.00@cid21.00 [115.00-1000.00]

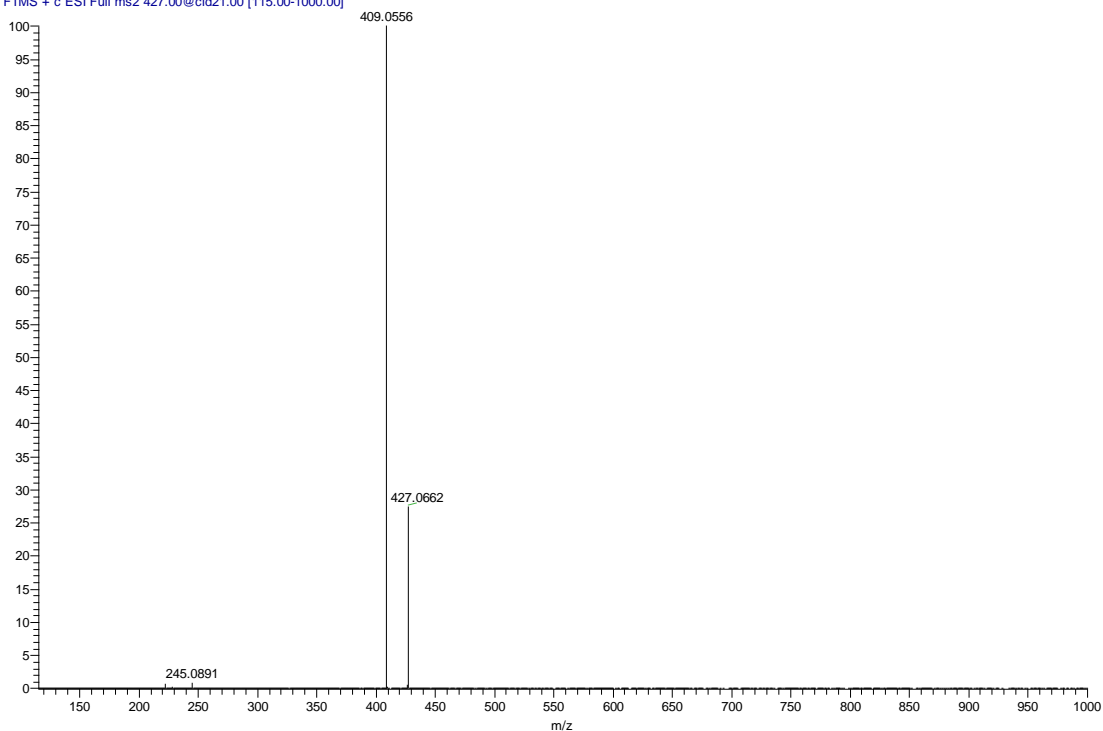

Error! Use the Home tab to apply Überschrift 1 to the text that you want to appear here.

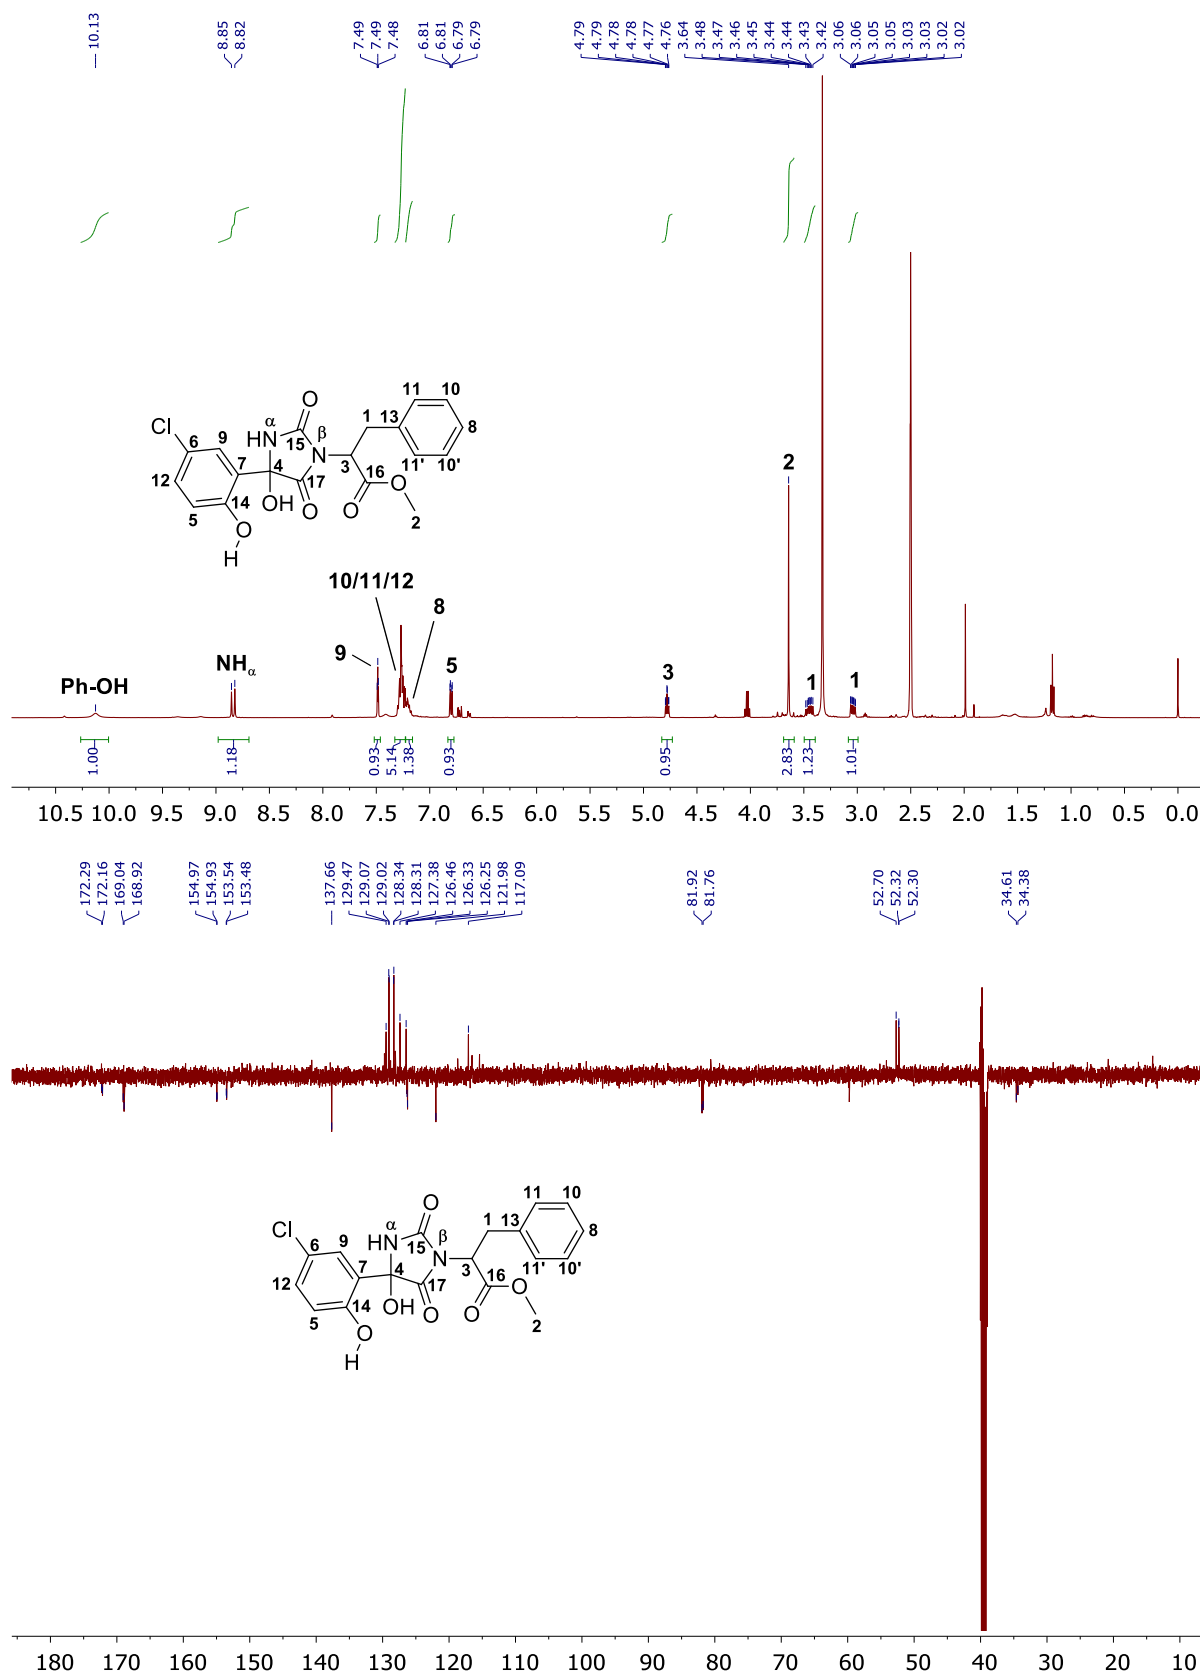

Figure S5: NMR- and ESI-spectra of **9E**.

Error! Use the Home tab to apply Überschrift 1 to the text that you want to appear here.

## 2.2 NMR-spectra of 5A

### Results from Experiment 5A-DE (Product after protonation)

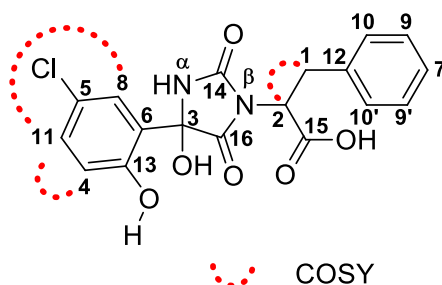

**Table S6:** 1D and 2D-NMR data of 2-(4-(5-chloro-2-hydroxyphenyl)-4-hydroxy-2,5-dioxoimidazolidin-1-yl)-3-phenylpropanoic acid (9A) in DMSO- $d_6$ , at 298 K and 499 MHz for  $^1\text{H}$  and 126 MHz for  $^{13}\text{C}$ .

| No.                  | $\delta_{\text{H}}$ [ppm], $J$ in [Hz]                                                                                              | $\delta_{\text{C}}$ [ppm], mult.                         | HMBC ( $^{\circ}\text{J}$ )                                                                                            |
|----------------------|-------------------------------------------------------------------------------------------------------------------------------------|----------------------------------------------------------|------------------------------------------------------------------------------------------------------------------------|
| 1                    | 3.02 ( $\frac{1}{2}$ H, dd, $J = 14.2, 6.6$ Hz)/3.18 ( $\frac{1}{2}$ H dd, $J = 14.2, 10.8$ Hz) + 3.44 (1H, dd, $J = 14.2, 5.6$ Hz) | 33.79+34.63, $\text{CH}_2$                               | $\text{C1} \rightarrow \text{H2}(^{\circ}\text{J}), \text{H10}(^{\circ}\text{J})$                                      |
| 2                    | 4.67 ( $\frac{1}{2}$ H, m) + 5.01 ( $\frac{1}{2}$ H, dd, $J = 10.8, 5.2$ Hz)                                                        | 52.92/53.00+53.76, CH                                    | $\text{C2} \rightarrow \text{H1}(^{\circ}\text{J})$                                                                    |
| 3                    | -                                                                                                                                   | 81.72+82.17, $\text{C}_q$                                | $\text{C3} \rightarrow \text{H4}(^{\circ}\text{J}), \text{H8}(^{\circ}\text{J}), \text{NH}_{\alpha}(^{\circ}\text{J})$ |
| 4                    | 6.80 (1H, d, $J = 8.6$ Hz)                                                                                                          | 117.2, $\text{CH}_{\text{arom}}$                         | -                                                                                                                      |
| 5                    | -                                                                                                                                   | 122.0, $\text{C}_q$                                      | $\text{C5} \rightarrow \text{H4}(^{\circ}\text{J}), \text{H8}(^{\circ}\text{J}), \text{H11}(^{\circ}\text{J})$         |
| 6                    | -                                                                                                                                   | 126.26+126.37, $\text{C}_q$                              | $\text{C6} \rightarrow \text{H4}(^{\circ}\text{J}), \text{Ph-OH}(^{\circ}\text{J})$                                    |
| 7                    | 7.20 (1H, m)                                                                                                                        | 126.32, $\text{CH}_{\text{arom}}$                        | $\text{C7} \rightarrow \text{H10}(^{\circ}\text{J})$                                                                   |
| 8                    | 7.46 (1H, d, $J = 2.7$ Hz)                                                                                                          | 126.8+127.37/127.39, $\text{CH}_{\text{arom}}$           | $\text{C8} \rightarrow \text{H11}(^{\circ}\text{J})$                                                                   |
| 9                    | 7.19 (1H, m) + 7.26 (1H, m)                                                                                                         | 128.27/128.30+128.47, $2 \times \text{CH}_{\text{arom}}$ | $\text{C9} \rightarrow \text{H9}(^{\circ}\text{J})$                                                                    |
| 10                   | 7.19 (1H, m) + 7.25 (1H, m)                                                                                                         | 128.8+128.95/128.99, $2 \times \text{CH}_{\text{arom}}$  | $\text{C10} \rightarrow \text{H1}(^{\circ}\text{J}), \text{H7}(^{\circ}\text{J}), \text{H10}(^{\circ}\text{J})$        |
| 11                   | 7.23 (1H, m)                                                                                                                        | 129.4, $\text{CH}_{\text{arom}}$                         | $\text{C11} \rightarrow \text{H8}(^{\circ}\text{J})$                                                                   |
| 12                   | -                                                                                                                                   | 137.0+138.30/138.31, $\text{C}_q$                        | $\text{C12} \rightarrow \text{H1}(^{\circ}\text{J}), \text{H2}(^{\circ}\text{J}), \text{H9}(^{\circ}\text{J})$         |
| 13                   | -                                                                                                                                   | 153.39+153.58/153.66, $\text{C}_q$                       | $\text{C13} \rightarrow \text{H4}(^{\circ}\text{J}), \text{H8}(^{\circ}\text{J}), \text{H11}(^{\circ}\text{J})$        |
| 14                   | -                                                                                                                                   | 155.11+155.15, $\text{C}_q$                              | $\text{C14} \rightarrow \text{H2}(^{\circ}\text{J}), \text{NH}_{\alpha}(^{\circ}\text{J})$                             |
| 15                   | -                                                                                                                                   | 169.14+169.94/169.96, $\text{C}_q$                       | $\text{C15} \rightarrow \text{H1}(^{\circ}\text{J}), \text{H2}(^{\circ}\text{J})$                                      |
| 16                   | -                                                                                                                                   | 172.23+172.34, $\text{C}_q$                              | $\text{C16} \rightarrow \text{H2}(^{\circ}\text{J}), \text{NH}_{\alpha}(^{\circ}\text{J})$                             |
| $\text{NH}_{\alpha}$ | 8.78+8.83 (1H, s)                                                                                                                   | -                                                        | -                                                                                                                      |
| $\text{N}_{\beta}$   | -                                                                                                                                   | -                                                        | -                                                                                                                      |
| Ph-OH                | 10.14 +10.16(1H, br)                                                                                                                | -                                                        | -                                                                                                                      |
| COOH                 | 12.95 (1H, br)                                                                                                                      | -                                                        | -                                                                                                                      |

### Chemical Formula:

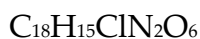

Error! Use the Home tab to apply Überschrift 1 to the text that you want to appear here.

---

**Molecular Weight:** 390.06g/mol

Error! Use the Home tab to apply Überschrift 1 to the text that you want to appear here.

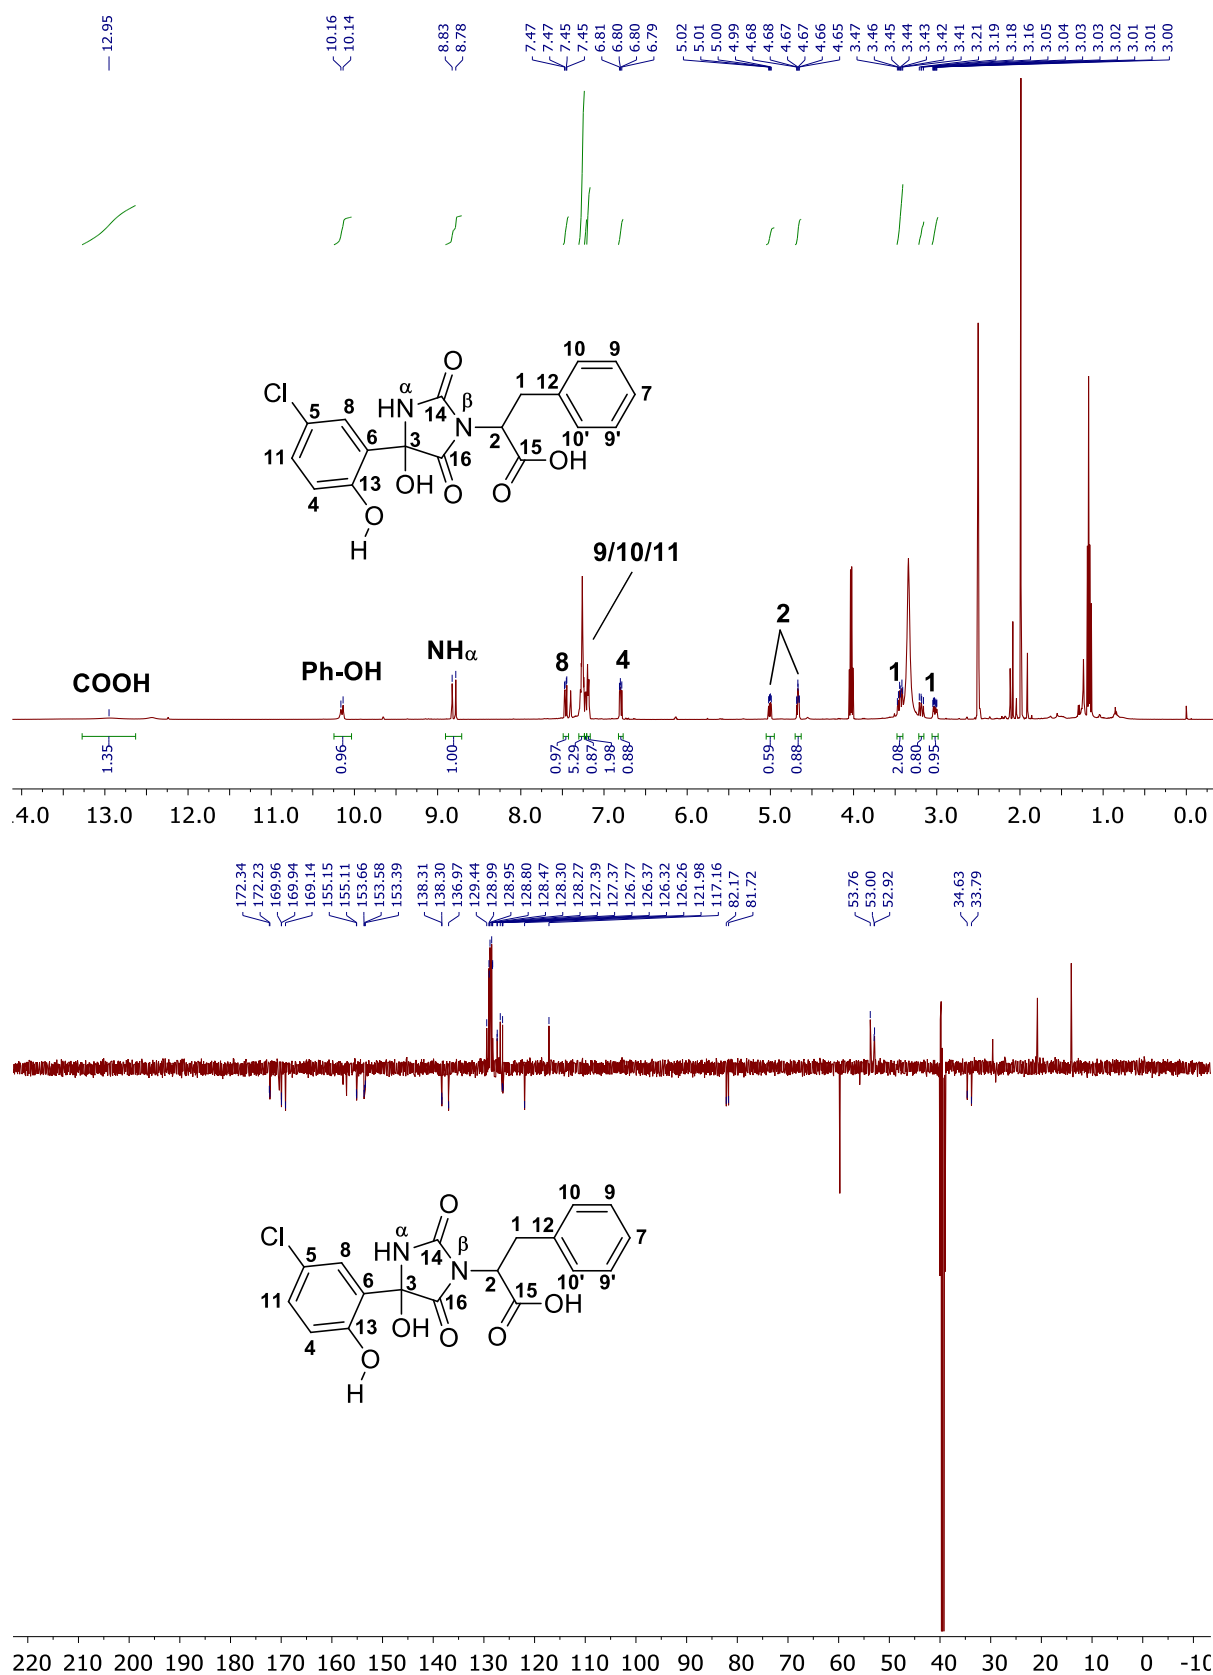

Error! Use the Home tab to apply Überschrift 1 to the text that you want to appear here.

---

Figure S6: NMR-spectra of **9A**.

Error! Use the Home tab to apply Überschrift 1 to the text that you want to appear here.

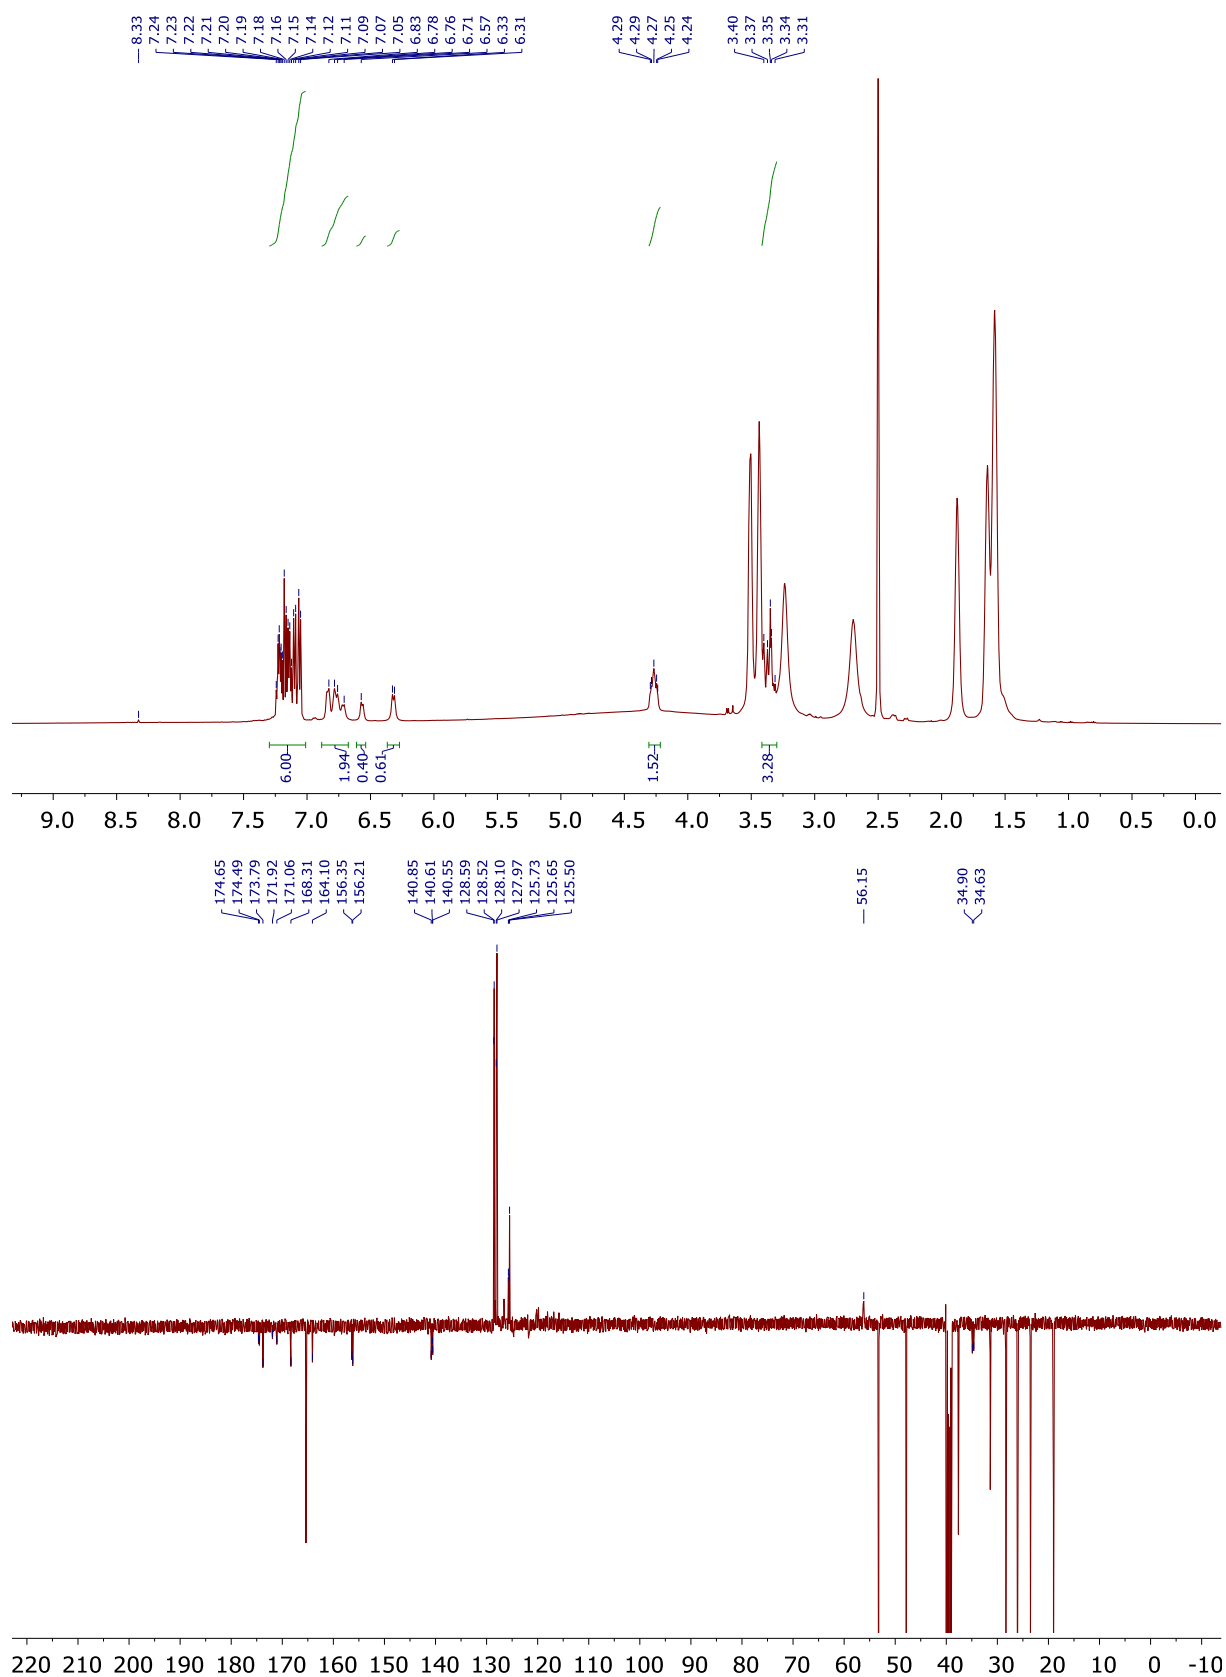

Error! Use the Home tab to apply Überschrift 1 to the text that you want to appear here.

Figure S7: NMR-spectra of 5A-DE before protonation (Contaminated with DBU).

## 2.3 NMR-spectra of 12

### Results from Experiment 8-DE (Product after 1 hour of oxidation)

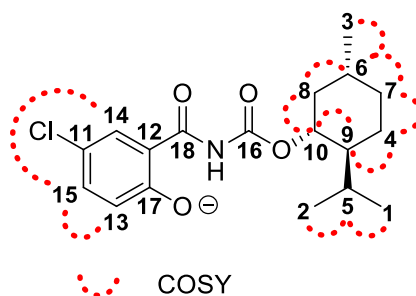

Table S5: 1D and 2D-NMR data of 4-chloro-2-((((1R,2S,5R)-2-isopropyl-5-methylcyclohexyl)oxy)carbonyl)carbamoylphenolate (12) in DMSO- $d_6$ , at 298 K and 500 MHz for  $^1\text{H}$  and 125 MHz for  $^{13}\text{C}$ .

| No. | $\delta_{\text{H}}$ [ppm], $J$ in [Hz] | $\delta_{\text{C}}, \delta_{\text{N}}$ [ppm], mult. | HMBC ( $^{\circ}J$ )                                                                                                                    |
|-----|----------------------------------------|-----------------------------------------------------|-----------------------------------------------------------------------------------------------------------------------------------------|
| 1   | 0.75 (3H, d, $J = 7.0$ Hz)             | 16.3, $\text{CH}_3$                                 | $\text{C1} \rightarrow \text{H2}(^3J), \text{H5}(^2J)$                                                                                  |
| 2   | 0.87 (3H, m)                           | 20.5, $\text{CH}_3$                                 | $\text{C2} \rightarrow \text{H1}(^3J), \text{H5}(^2J)$                                                                                  |
| 3   | 0.89 (3H, m)                           | 22.0, $\text{CH}_3$                                 | $\text{C3} \rightarrow \text{H8}(^3J)$                                                                                                  |
| 4   | 1.04 (1H, m); 1.62 (1H, m)             | 23.1, $\text{CH}_2$                                 | $\text{C4} \rightarrow \text{H9}(^2J)$                                                                                                  |
| 5   | 1.90 (1H, m)                           | 25.8, CH                                            | $\text{C5} \rightarrow \text{H1}(^2J), \text{H2}(^2J), \text{H10}(^3J)$                                                                 |
| 6   | 1.45 (1H, m)                           | 30.9, CH                                            | $\text{C6} \rightarrow \text{H3}(^2J), \text{H8}(^2J)$                                                                                  |
| 7   | 0.84 (1H, m); 1.65 (1H, m)             | 33.8, $\text{CH}_2$                                 | $\text{C7} \rightarrow \text{H3}(^3J), \text{H8}(^3J)$                                                                                  |
| 8   | 0.98 (1H, m); 1.92 (1H, m)             | 40.9, $\text{CH}_2$                                 | $\text{C8} \rightarrow \text{H3}(^3J), \text{H10}(^2J)$                                                                                 |
| 9   | 1.34 (1H, m)                           | 46.6, CH                                            | $\text{C9} \rightarrow \text{H1}(^3J), \text{H2}(^3J), \text{H4}(^2J), \text{H5}(^2J), \text{H7}(^3J), \text{H8}(^3J), \text{H10}(^2J)$ |
| 10  | 4.50 (1H, td, $J = 10.9, 4.3$ Hz)      | 72.9, CH                                            | $\text{C10} \rightarrow \text{H4}(^3J), \text{H8}(^2J), \text{H9}(^2J)$                                                                 |
| 11  | -                                      | 112.5, $\text{C}_q$                                 | $\text{C11} \rightarrow \text{H13}(^3J), \text{H14}(^2J), \text{H15}(^2J)$                                                              |
| 12  | -                                      | 117.6, $\text{C}_q$                                 | $\text{C12} \rightarrow \text{H13}(^3J)$                                                                                                |
| 13  | 6.34 (1H, d, $J = 8.9$ Hz)             | 124.0, $\text{CH}_{\text{arom}}$                    | -                                                                                                                                       |
| 14  | 7.50 (1H, d, $J = 3.1$ Hz)             | 128.2, $\text{CH}_{\text{arom}}$                    | $\text{C14} \rightarrow \text{H15}(^3J)$                                                                                                |
| 15  | 6.92 (1H, dd, $J = 9.0, 3.1$ Hz)       | 132.5, $\text{CH}_{\text{arom}}$                    | $\text{C15} \rightarrow \text{H14}(^3J)$                                                                                                |
| 16  | -                                      | 151.8, $\text{C}_q$                                 | $\text{C16} \rightarrow \text{H10}(^3J)$                                                                                                |
| 17  | -                                      | 165.9, $\text{C}_q$                                 | $\text{C17} \rightarrow \text{H13}(^2J), \text{H14}(^3J)$                                                                               |
| 18  | -                                      | 170.8, $\text{C}_q$                                 | $\text{C18} \rightarrow \text{H13}(^4J), \text{H14}(^3J), \text{H15}(^3J)$                                                              |
| NH  | 15.91 (1H, s)                          | 139.9, NH                                           | -                                                                                                                                       |

**Chemical Formula:**  $\text{C}_{18}\text{H}_{23}\text{ClNO}_4^-$

**Molecular Weight:** 352.83 g/mol

Error! Use the Home tab to apply Überschrift 1 to the text that you want to appear here.

---

Error! Use the Home tab to apply Überschrift 1 to the text that you want to appear here.

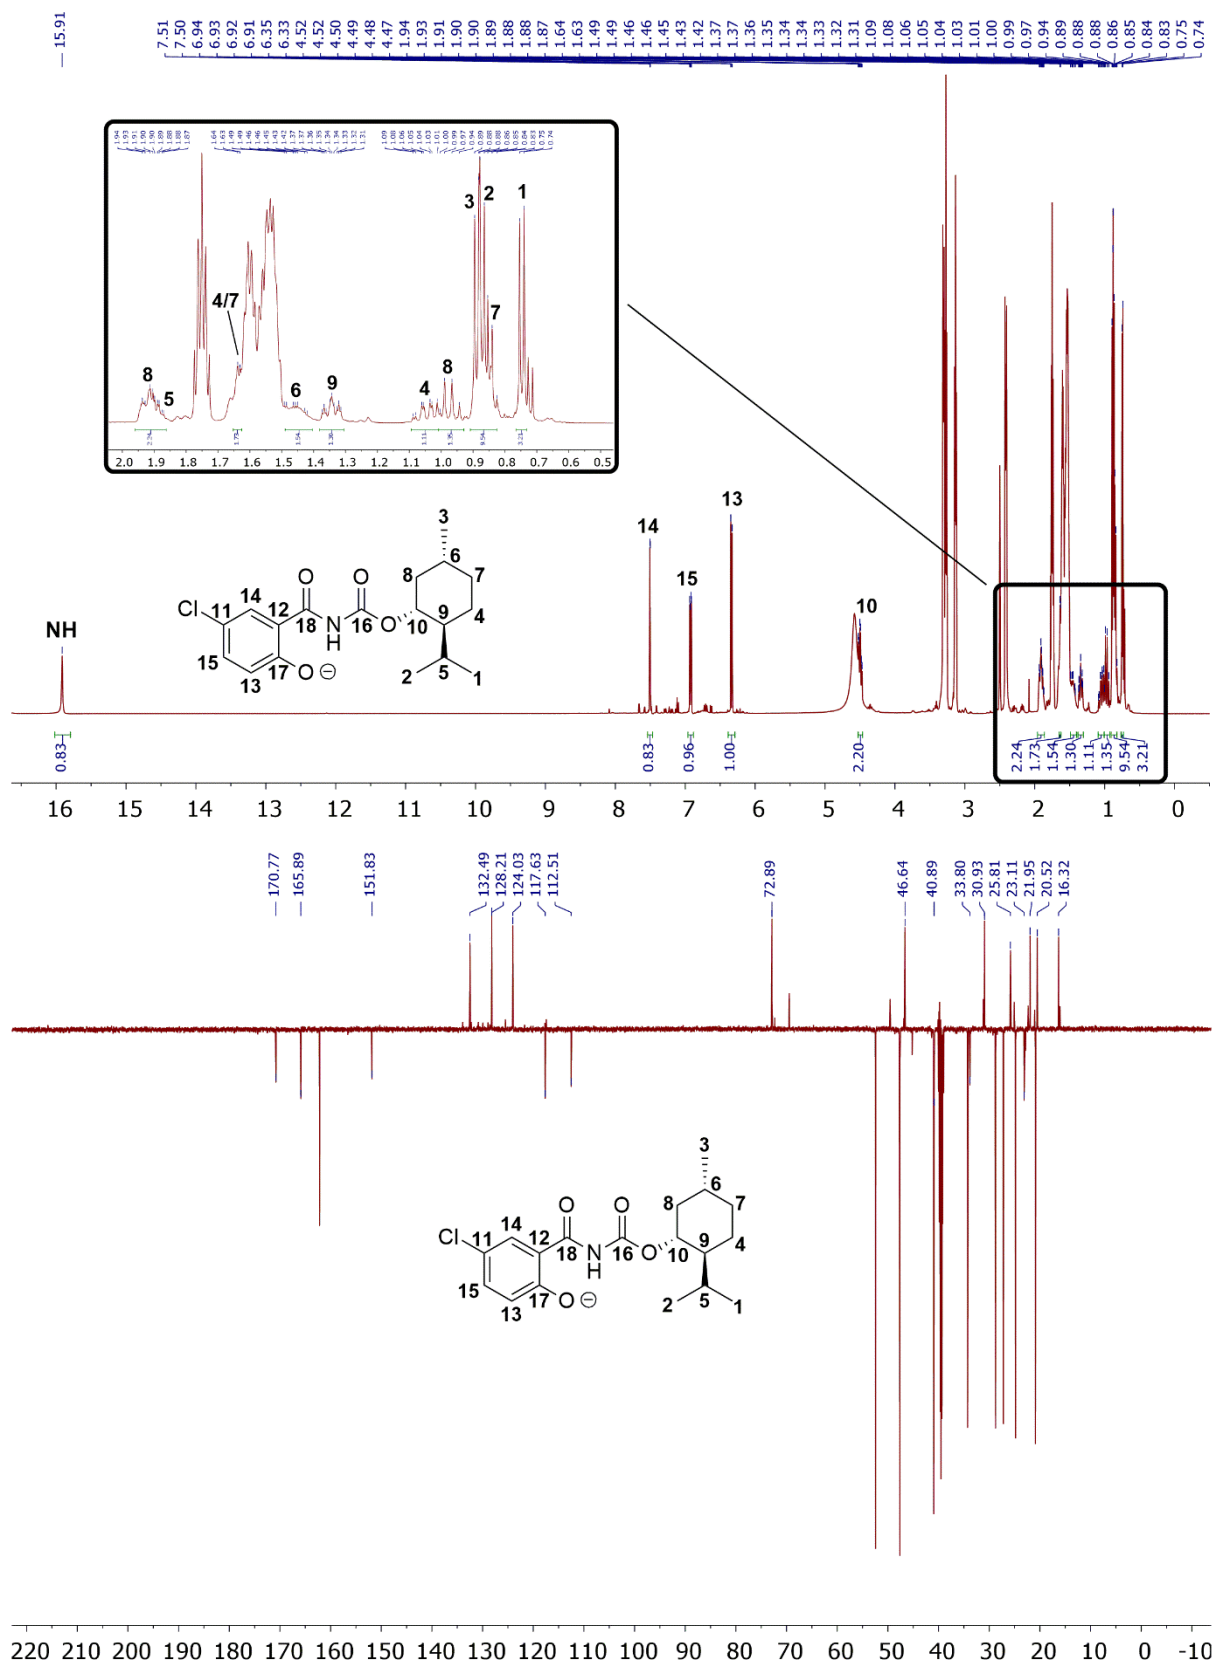

Figure S8: NMR-spectra of **12** (Contaminated with DBU).
